# Supplementary material for: Direct amination and N-heteroarylation of perylenediimides
Source: Royal Society of Chemistry journal article supplement (doi:10.1039/c9qo00491b), 2019-01-01

ELECTRONIC SUPPLEMENTARY INFORMATION

**Direct Amination and *N*-Heteroarylation of Perylenediimides**

David Gutiérrez-Moreno, Ángela Sastre-Santos and Fernando Fernández-Lázaro\*

|                                                                  |        |
|------------------------------------------------------------------|--------|
| CV of compound <b>18a</b>                                        | p. S2  |
| <sup>1</sup> H- and <sup>13</sup> C-NMR spectra of new compounds | p. S3  |
| <sup>1</sup> H-NMR spectra of already described compounds        | p. S33 |

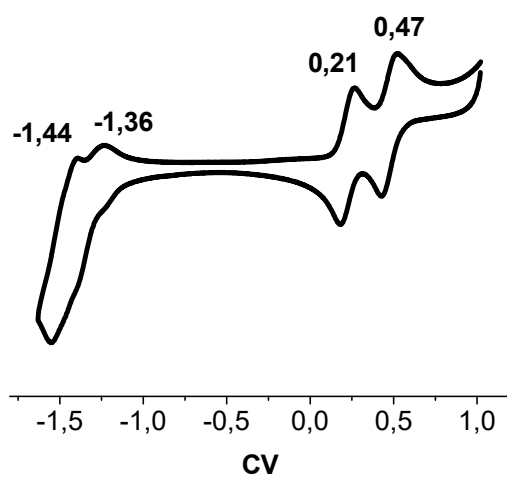

**Figure S1** CV of compound **18a** ( $\text{CH}_2\text{Cl}_2$  solution containing 0.1 M  $\text{TBAPF}_6$  as the supporting electrolyte and  $\text{Fc}/\text{Fc}^+$  as the internal standard).

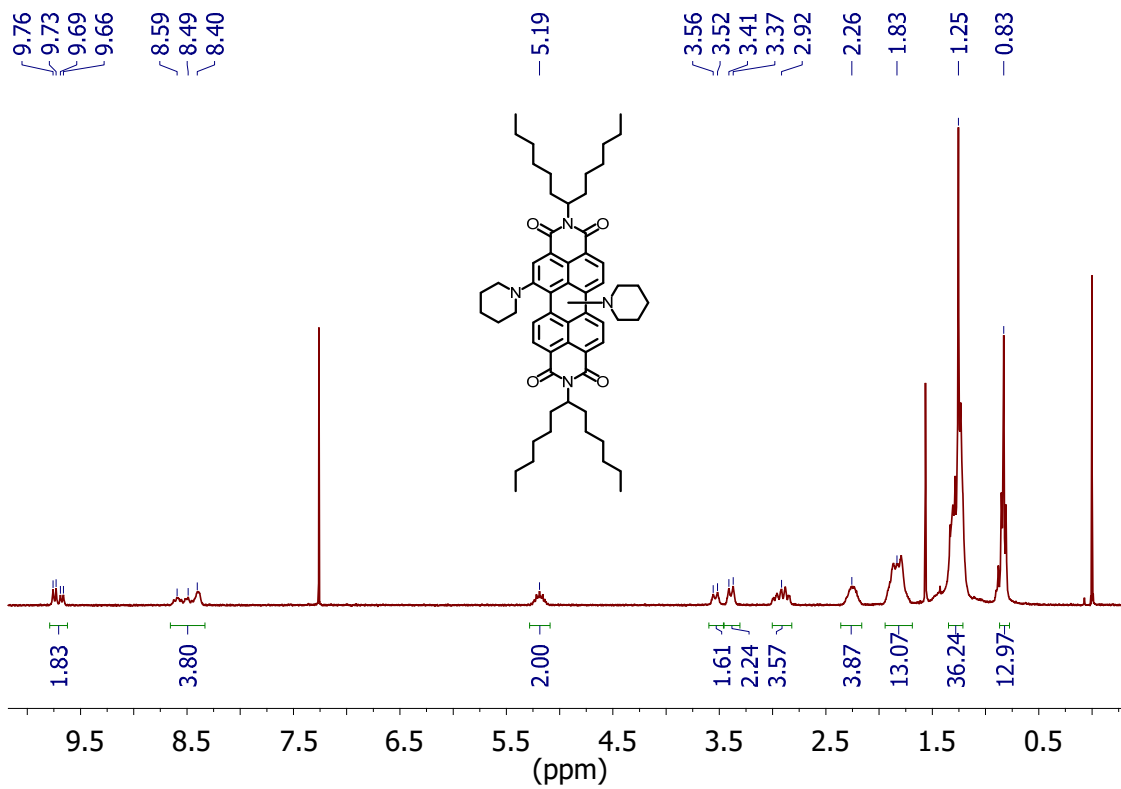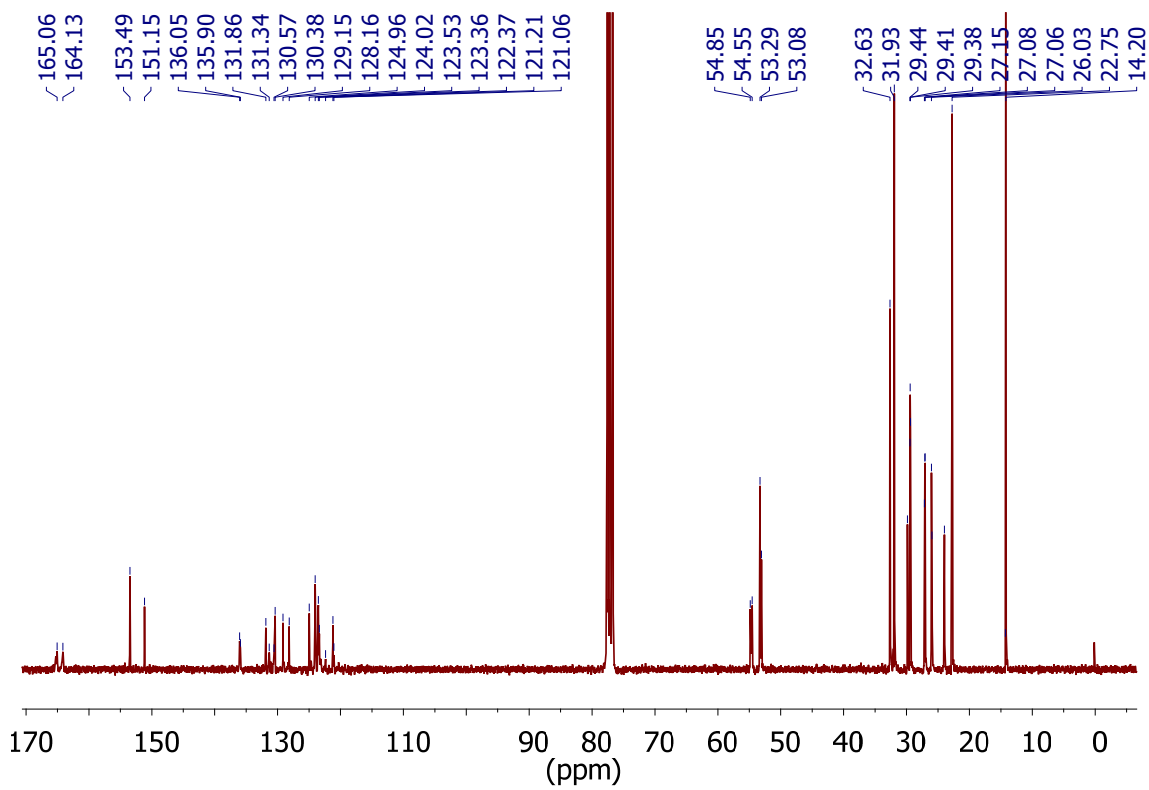

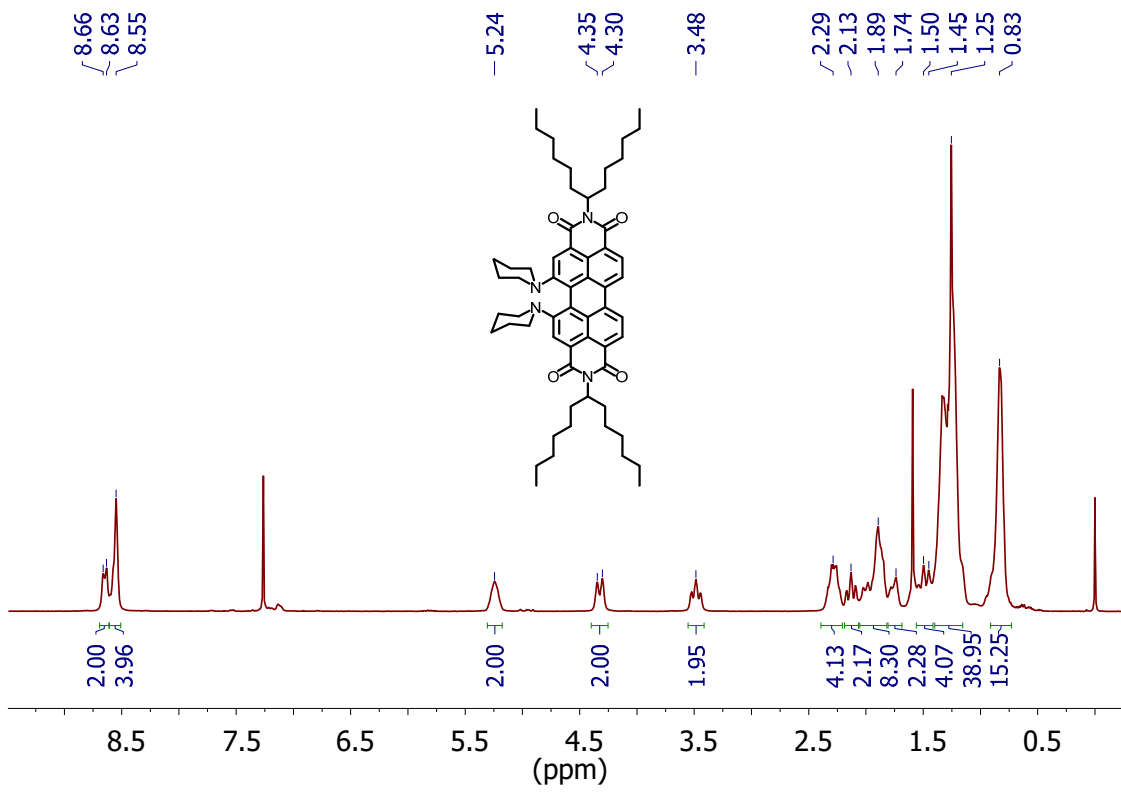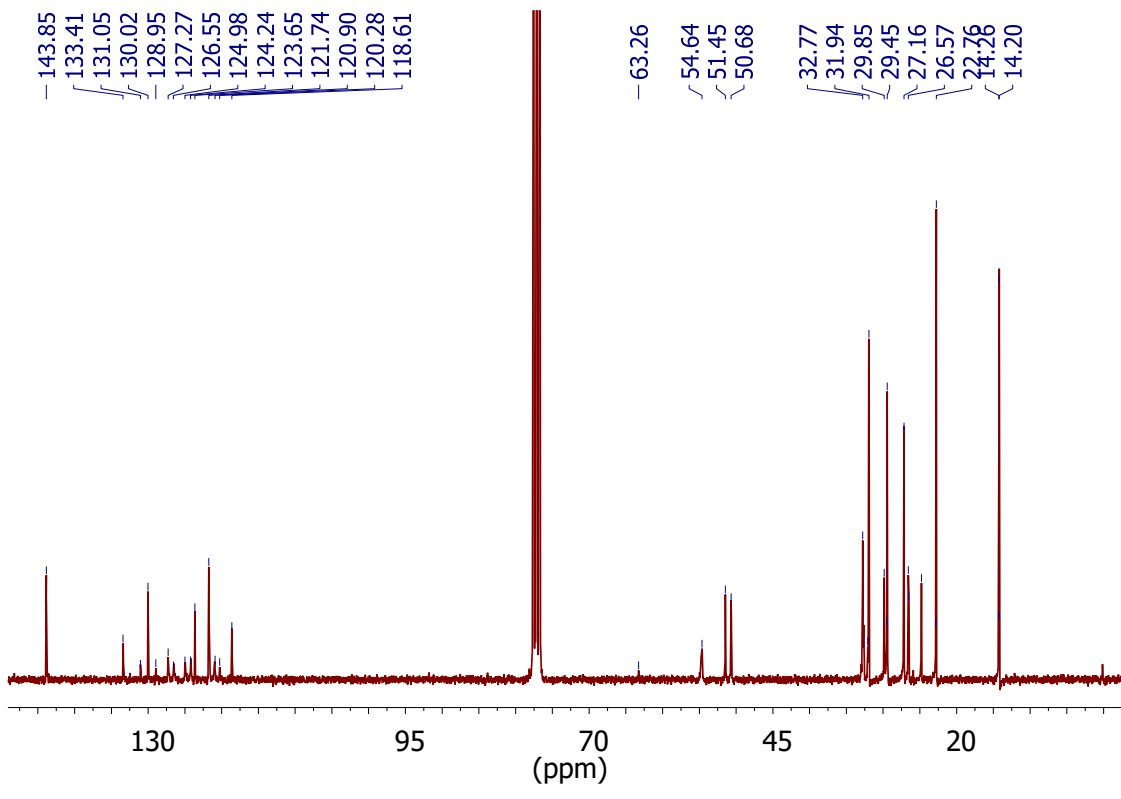

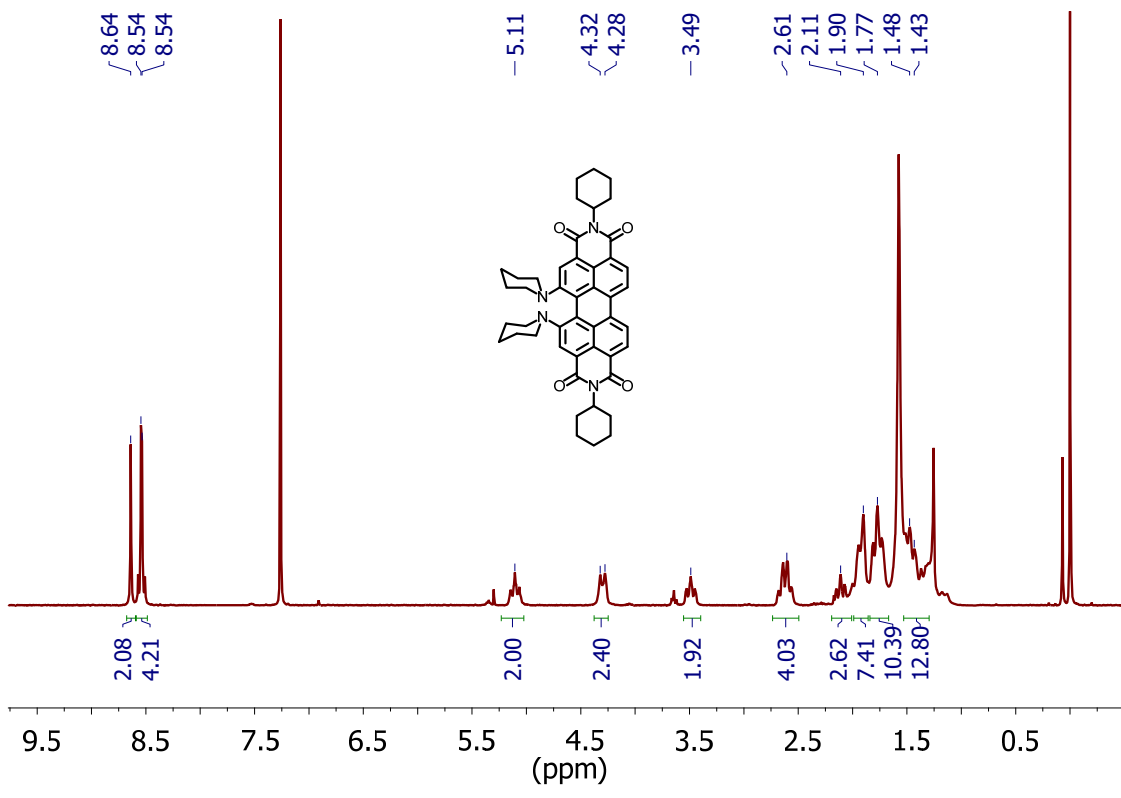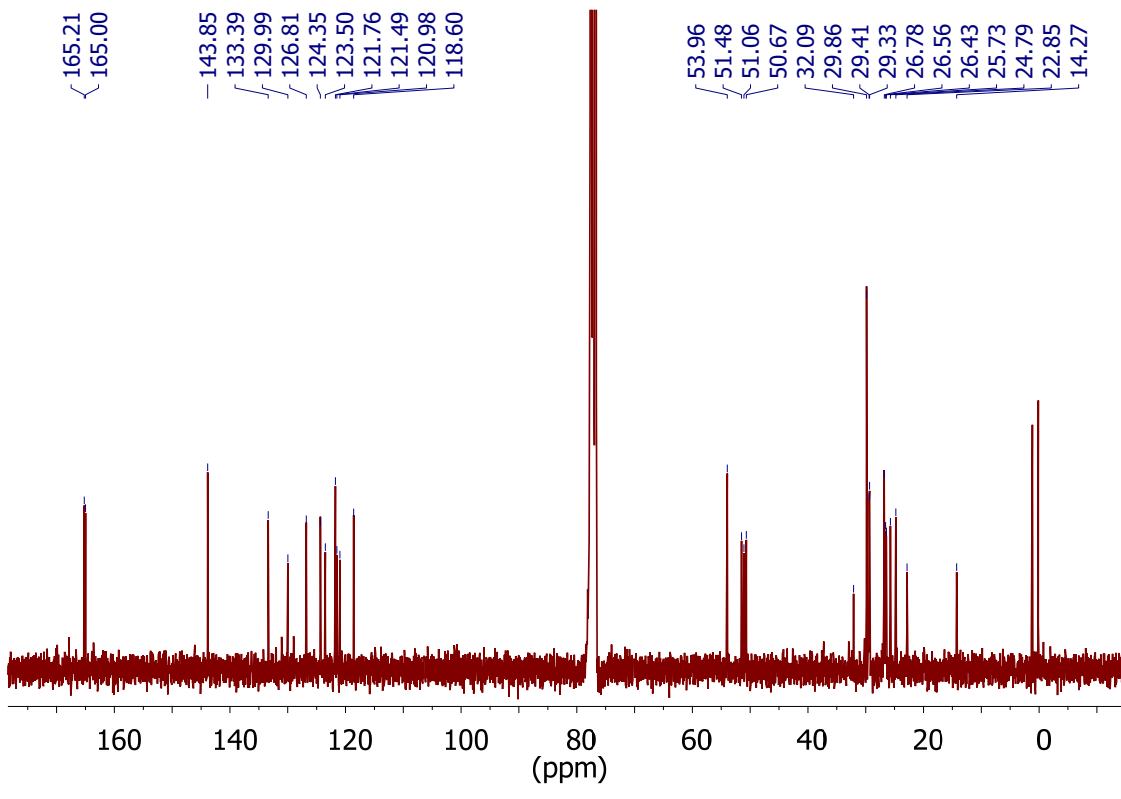

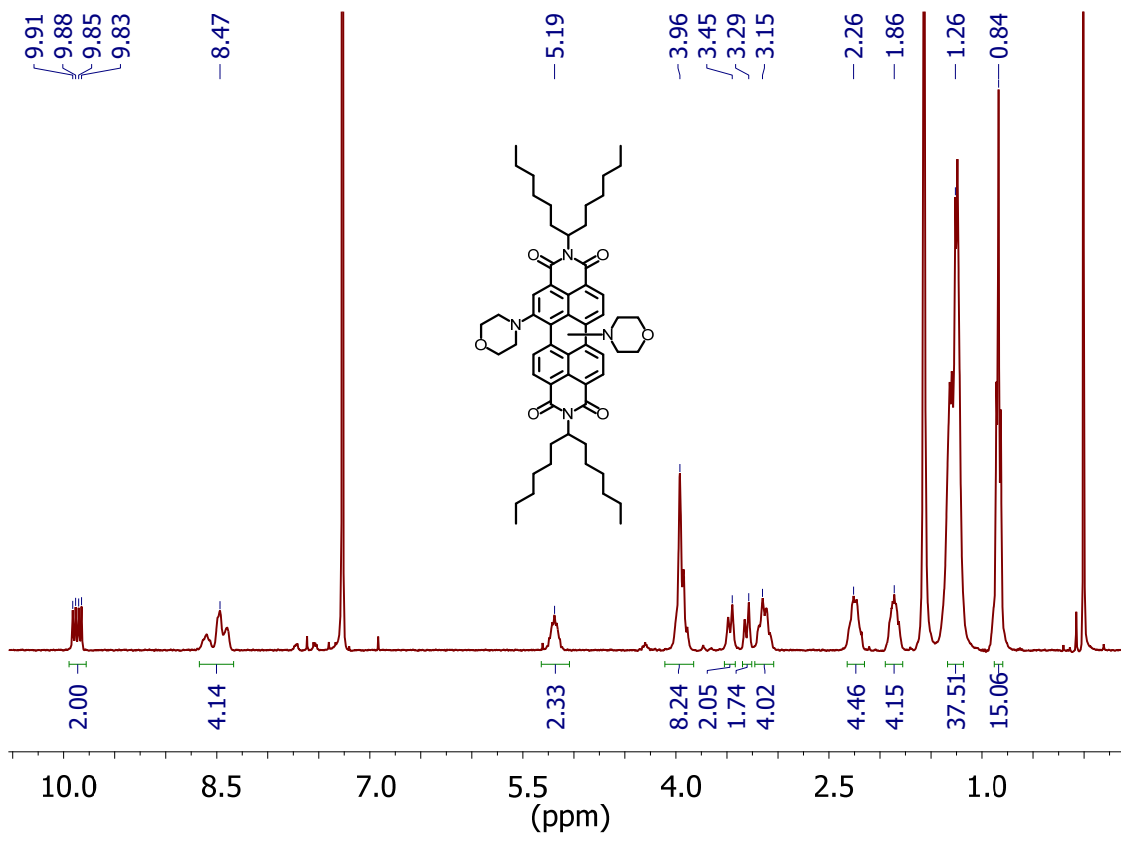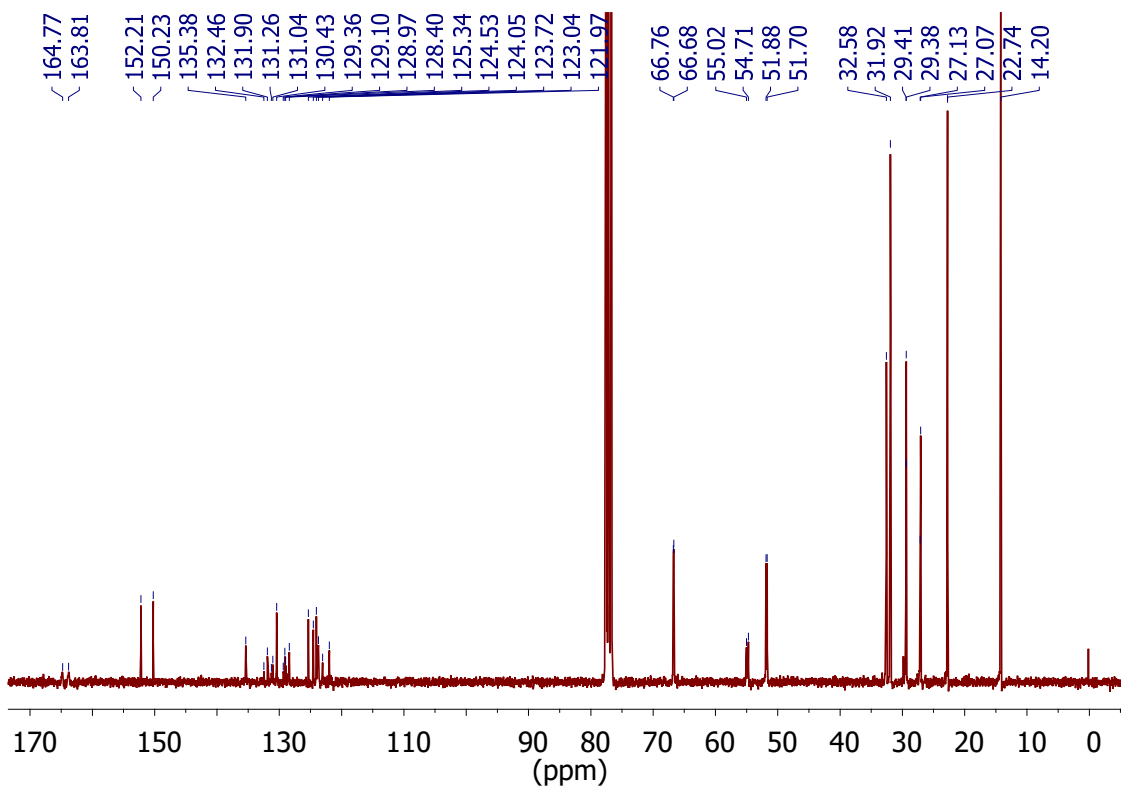

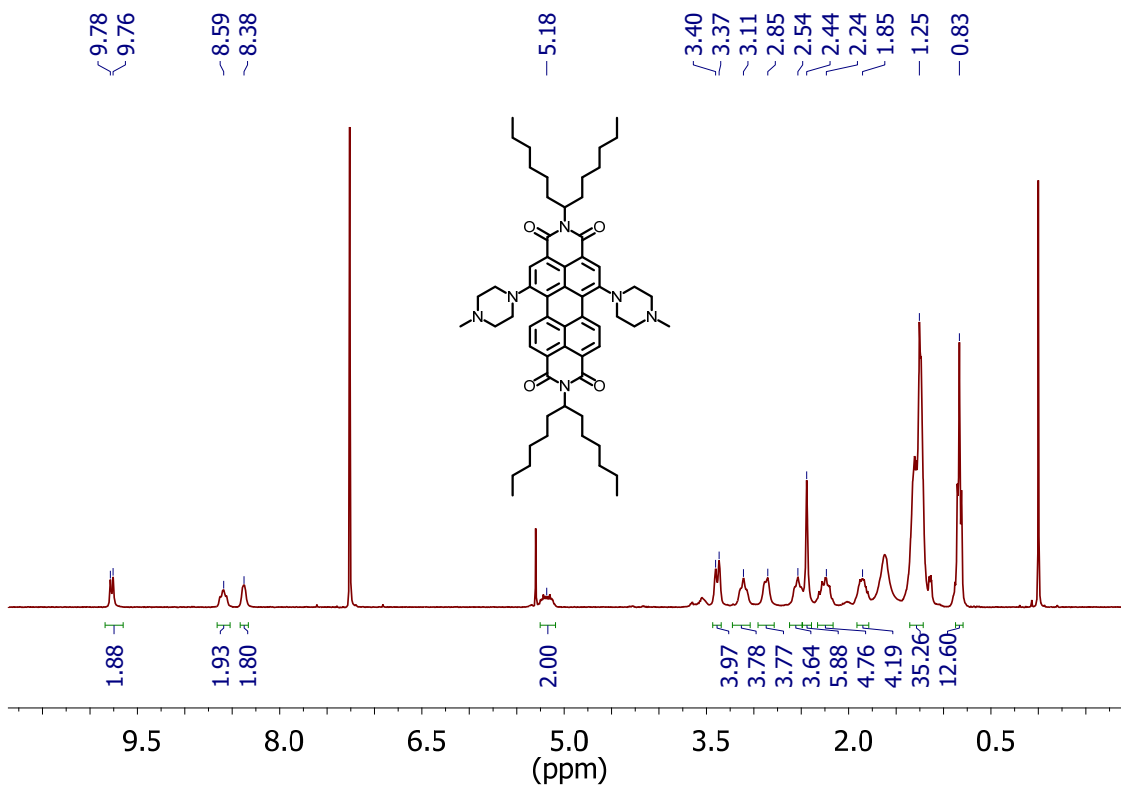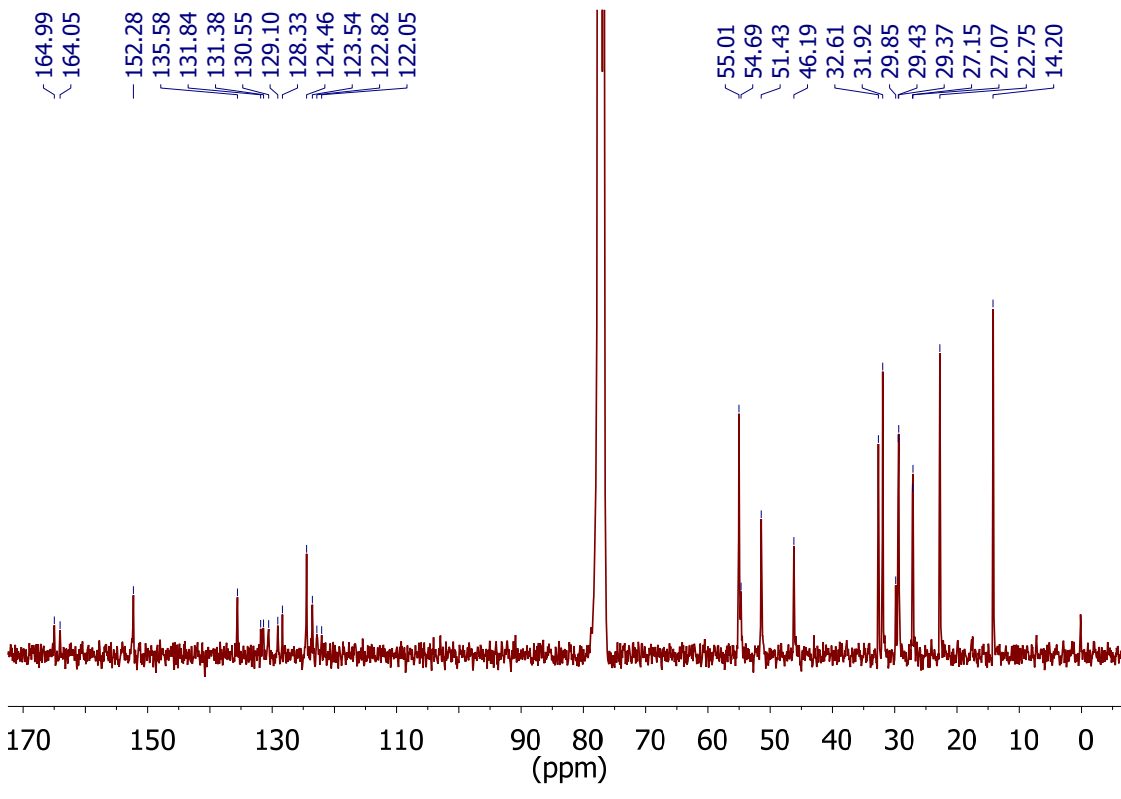

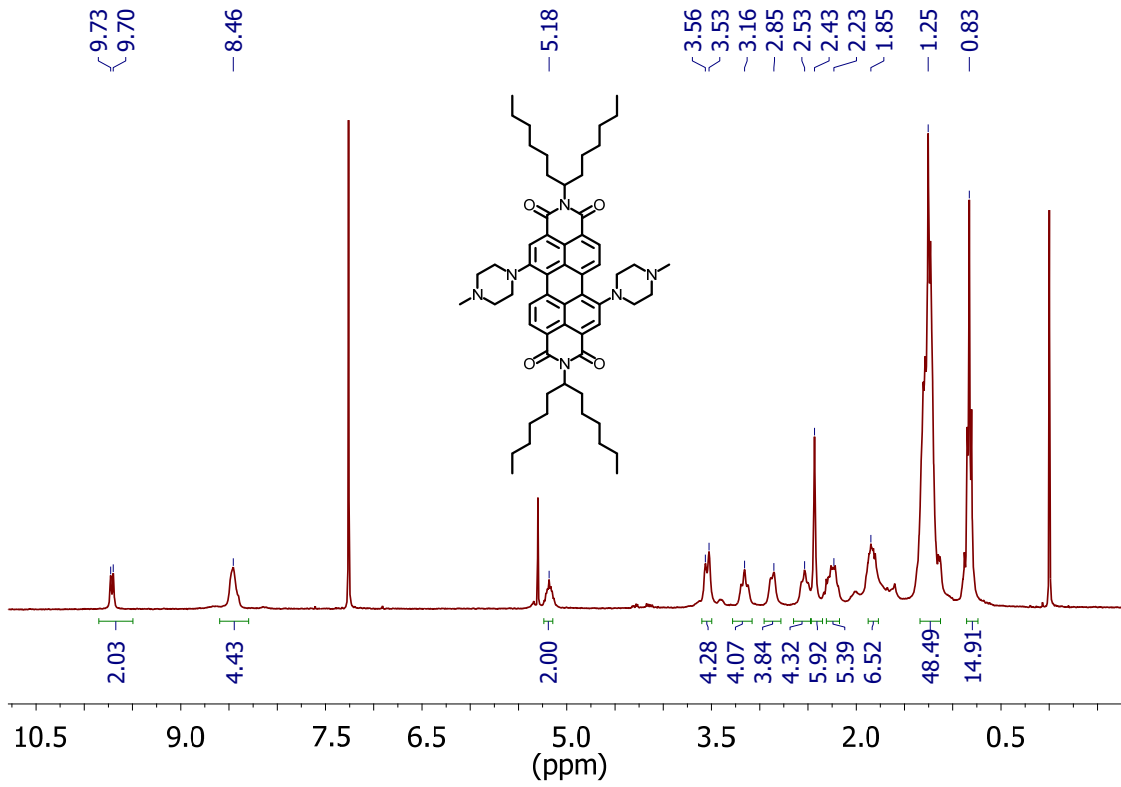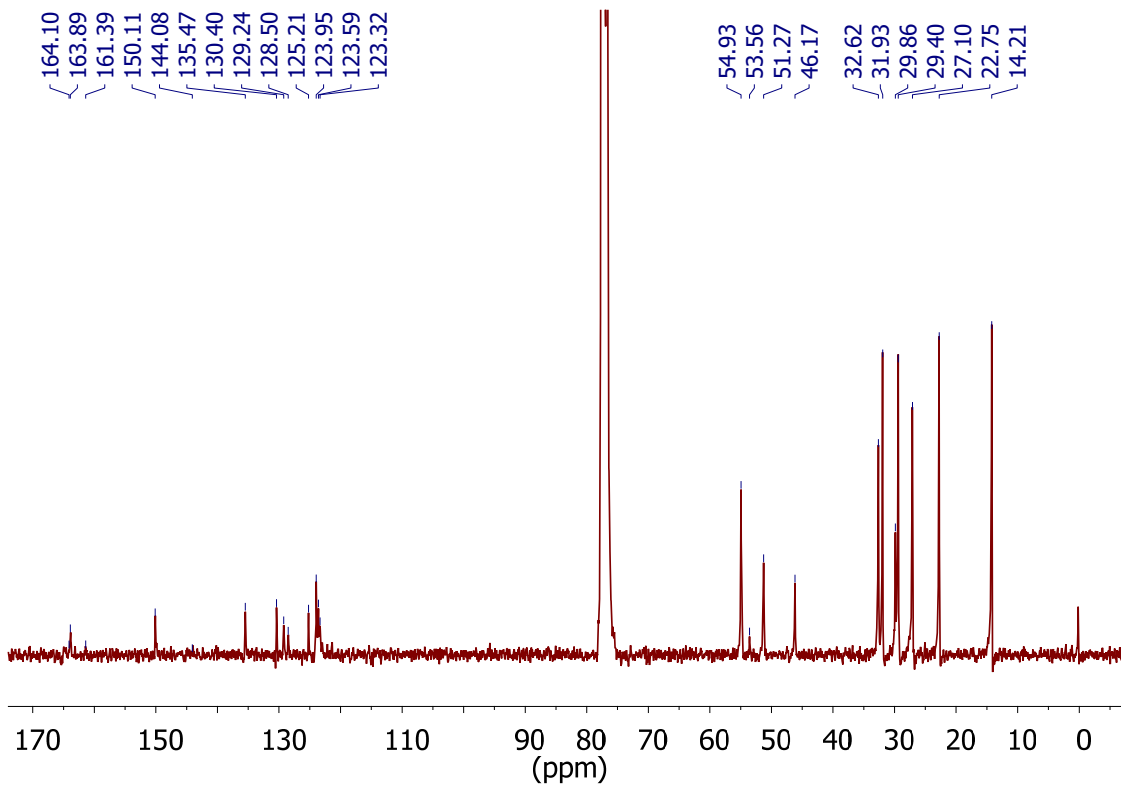



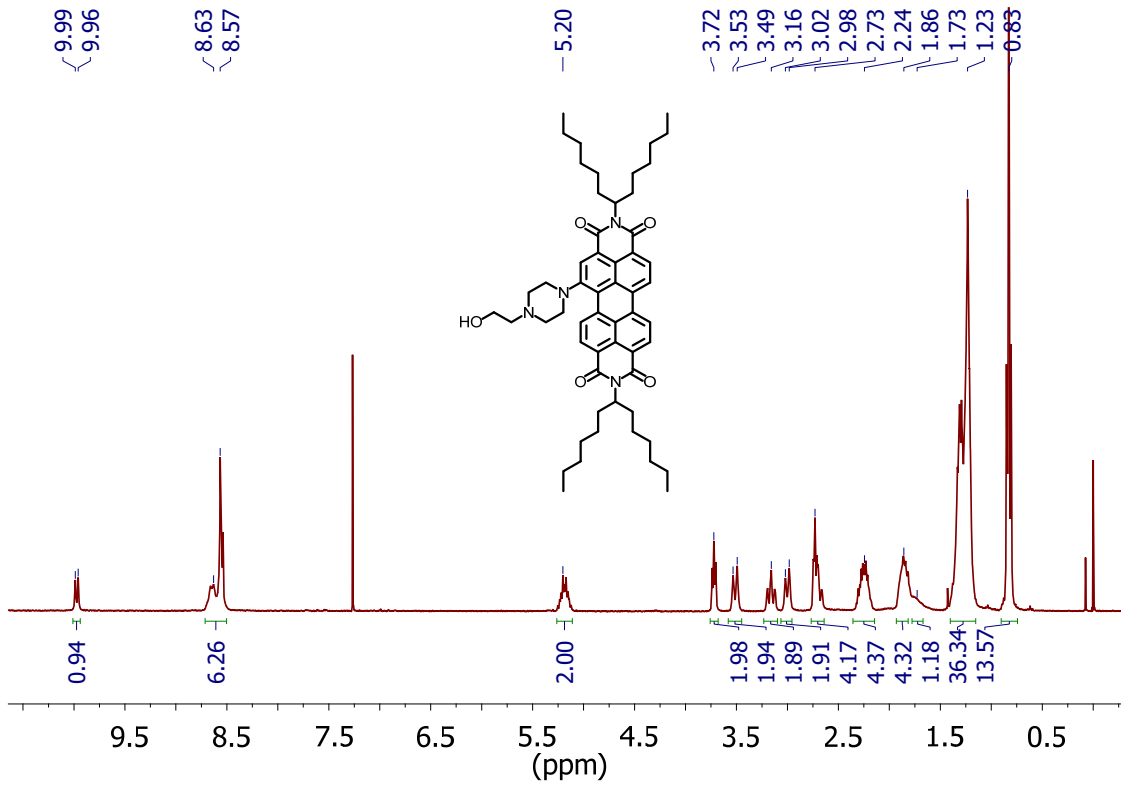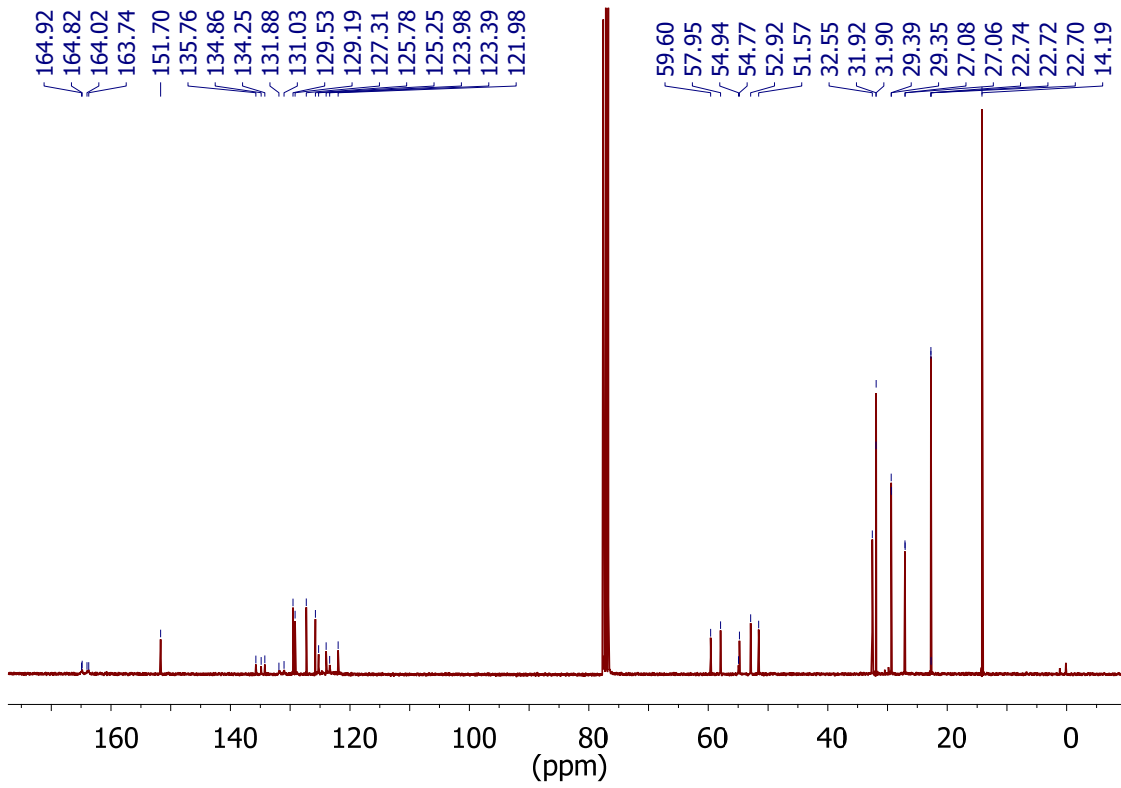

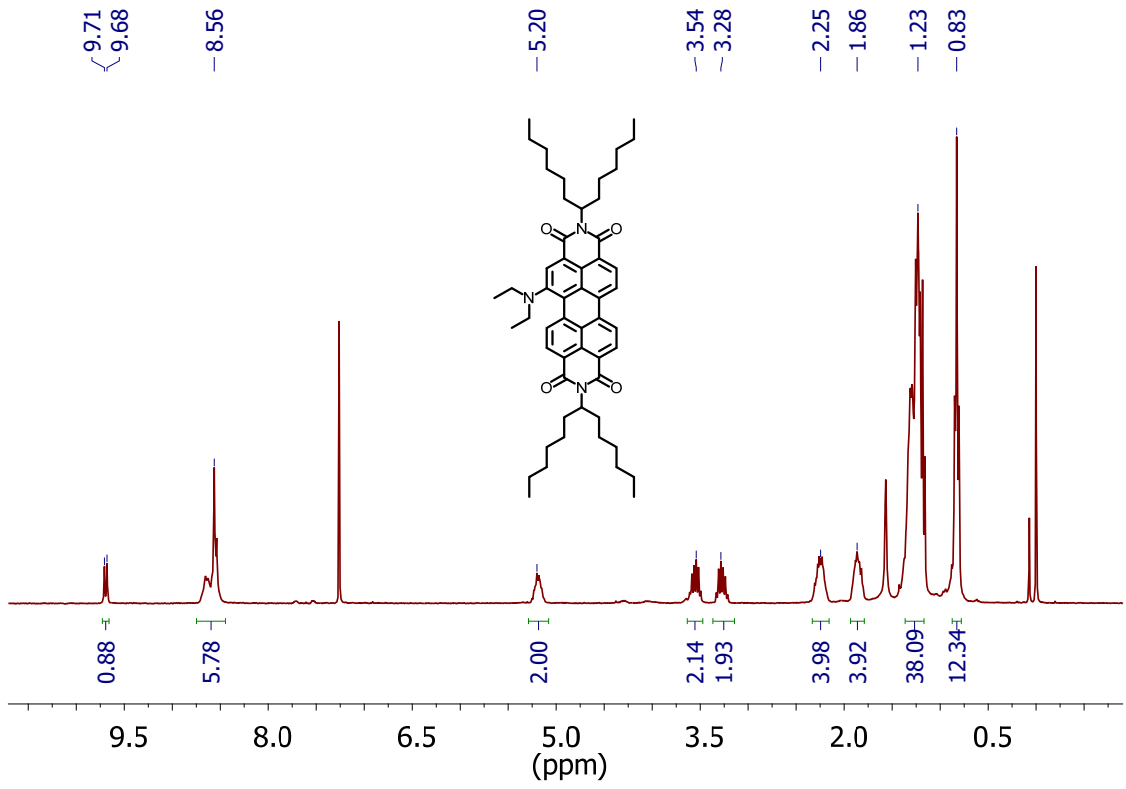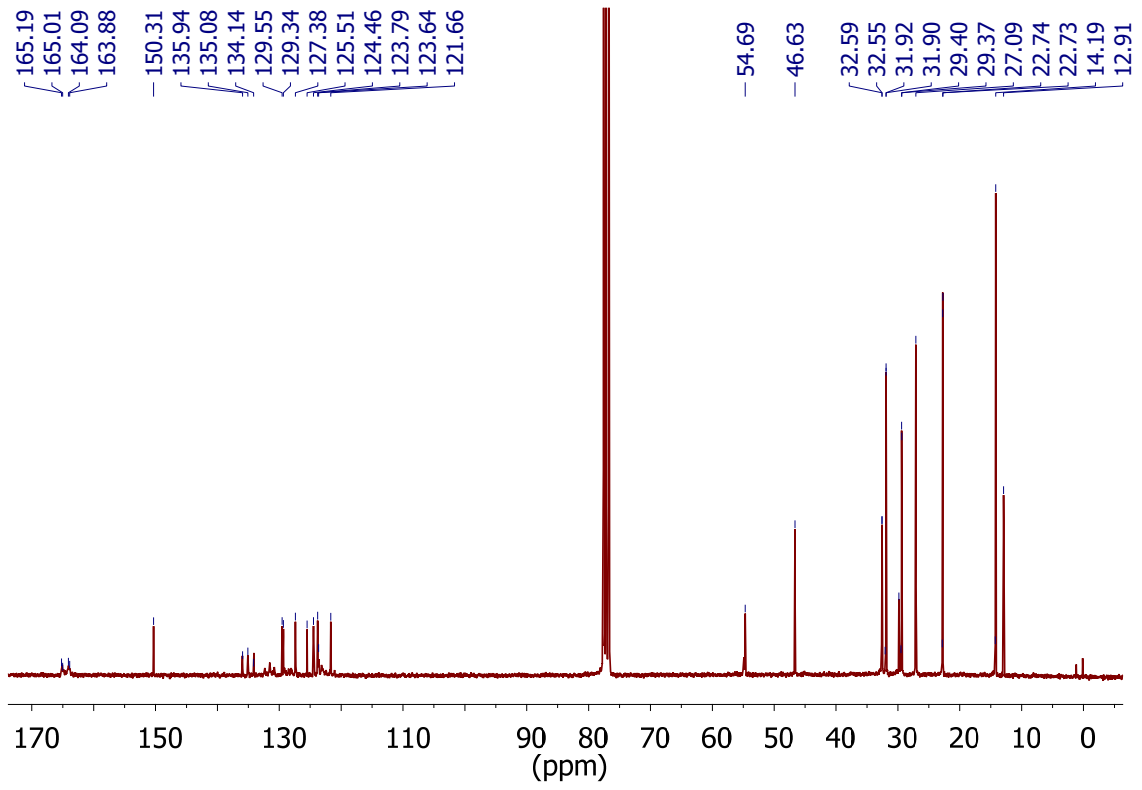

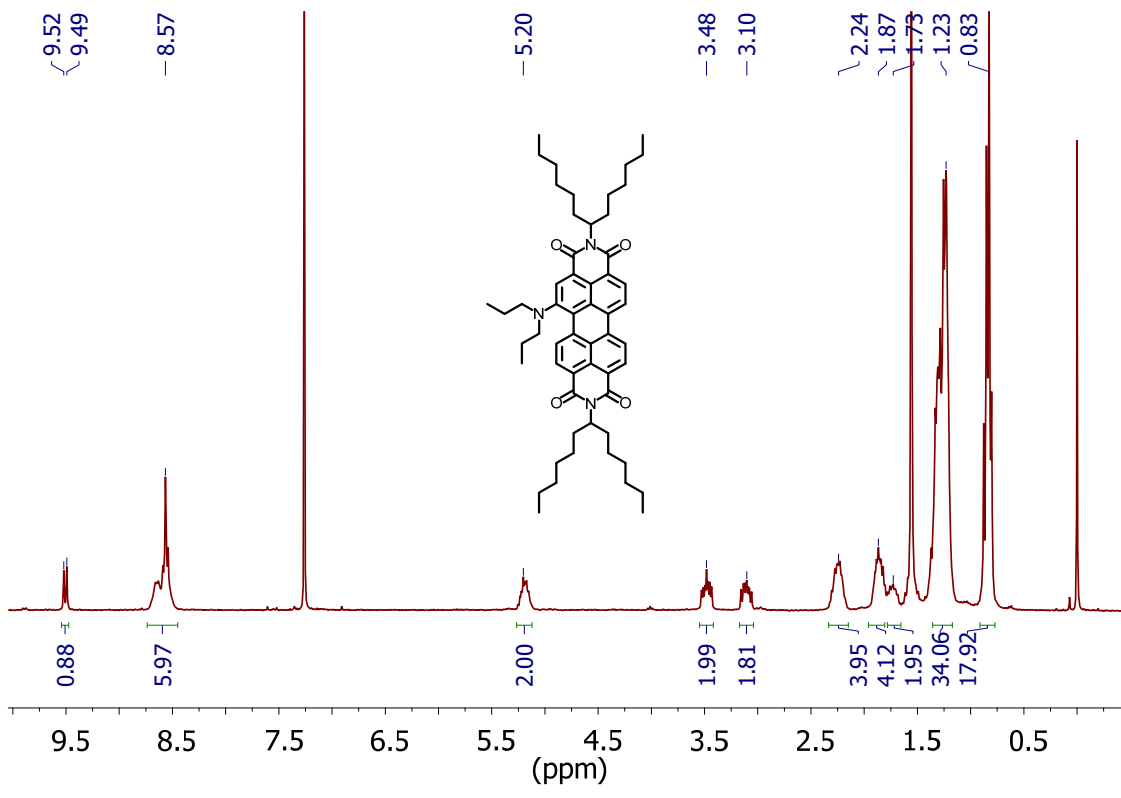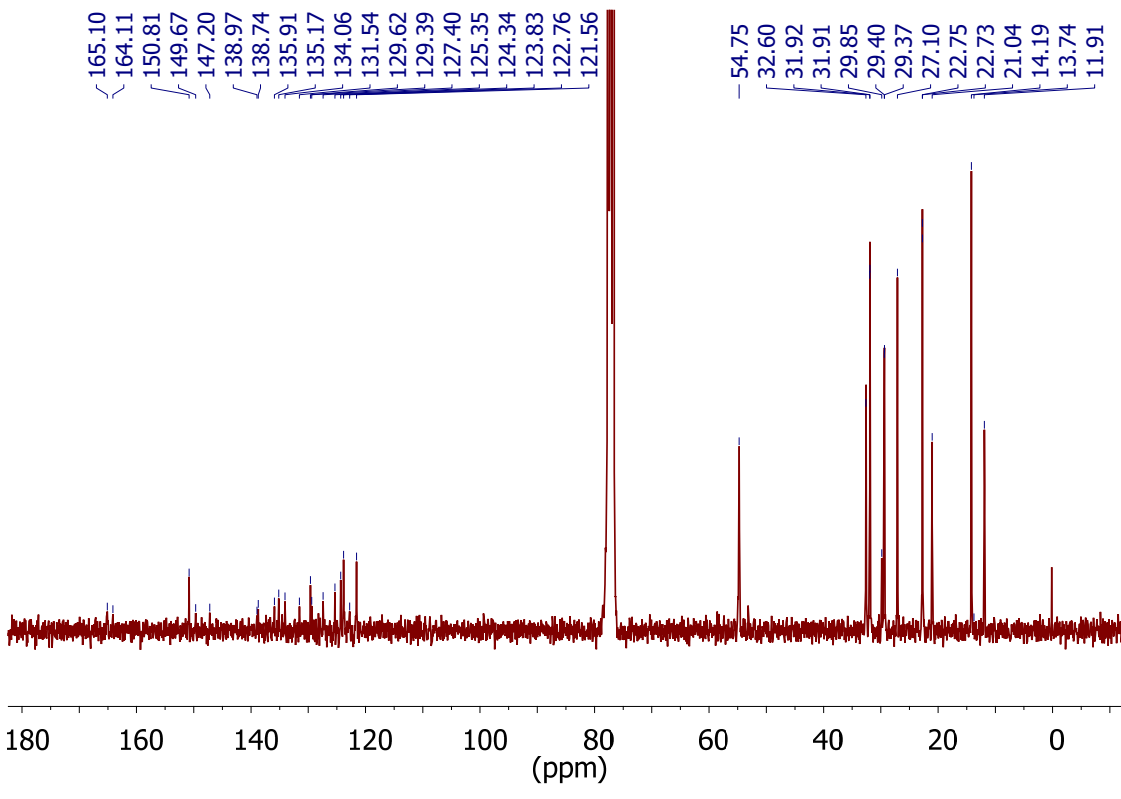

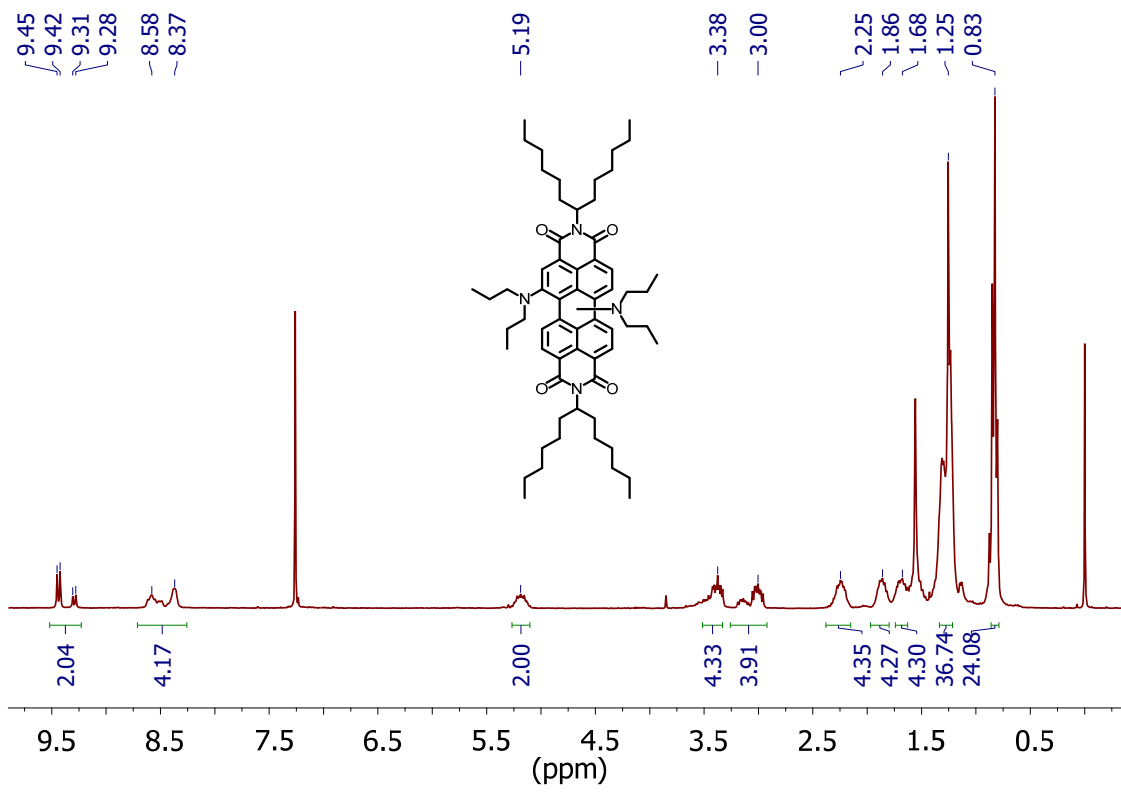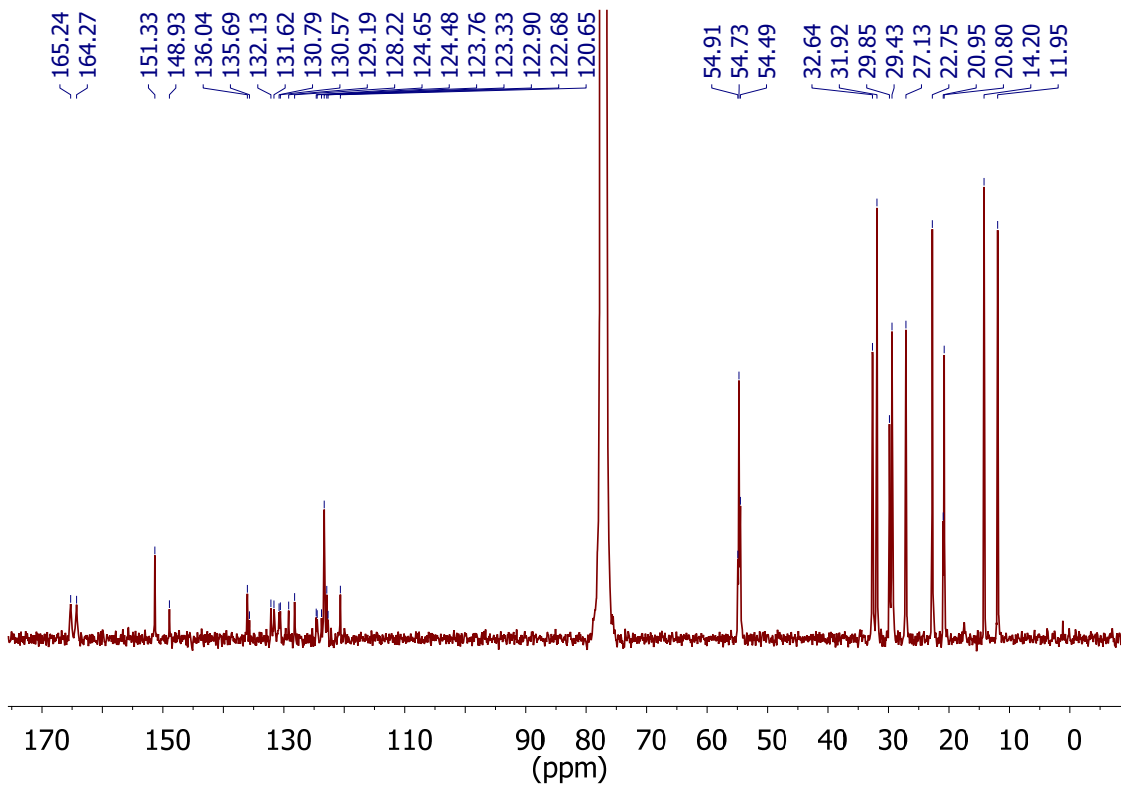

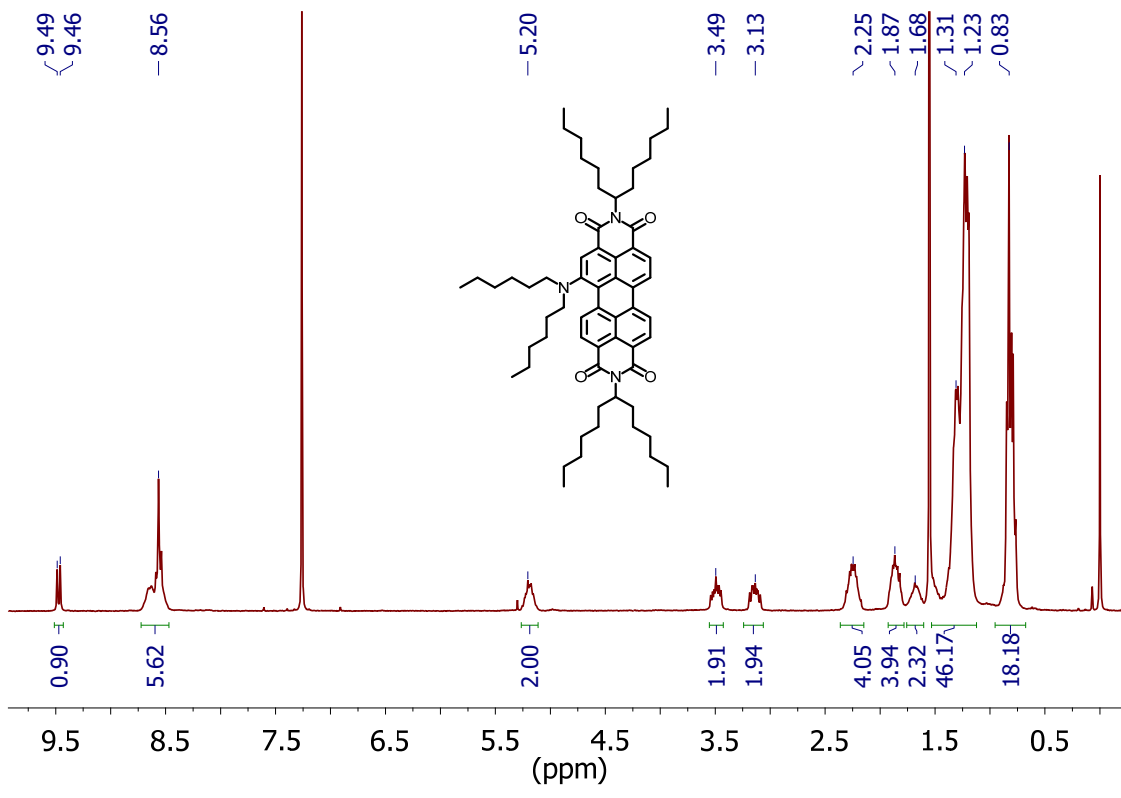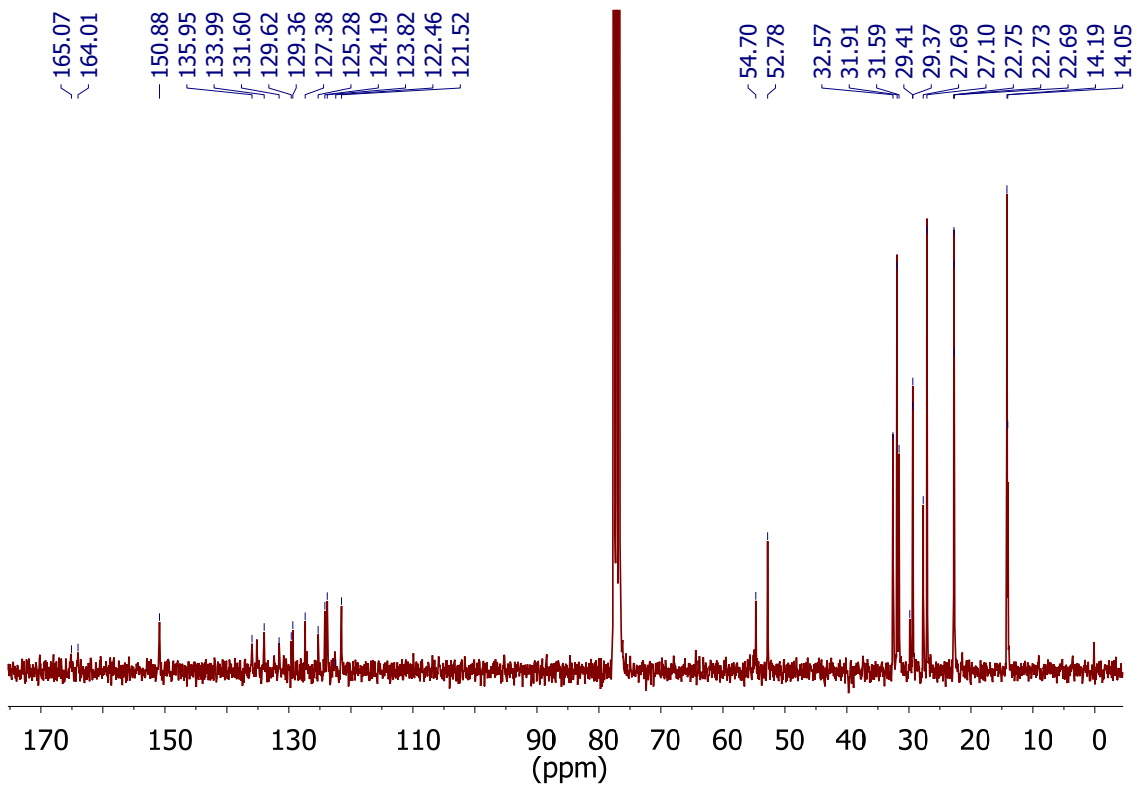

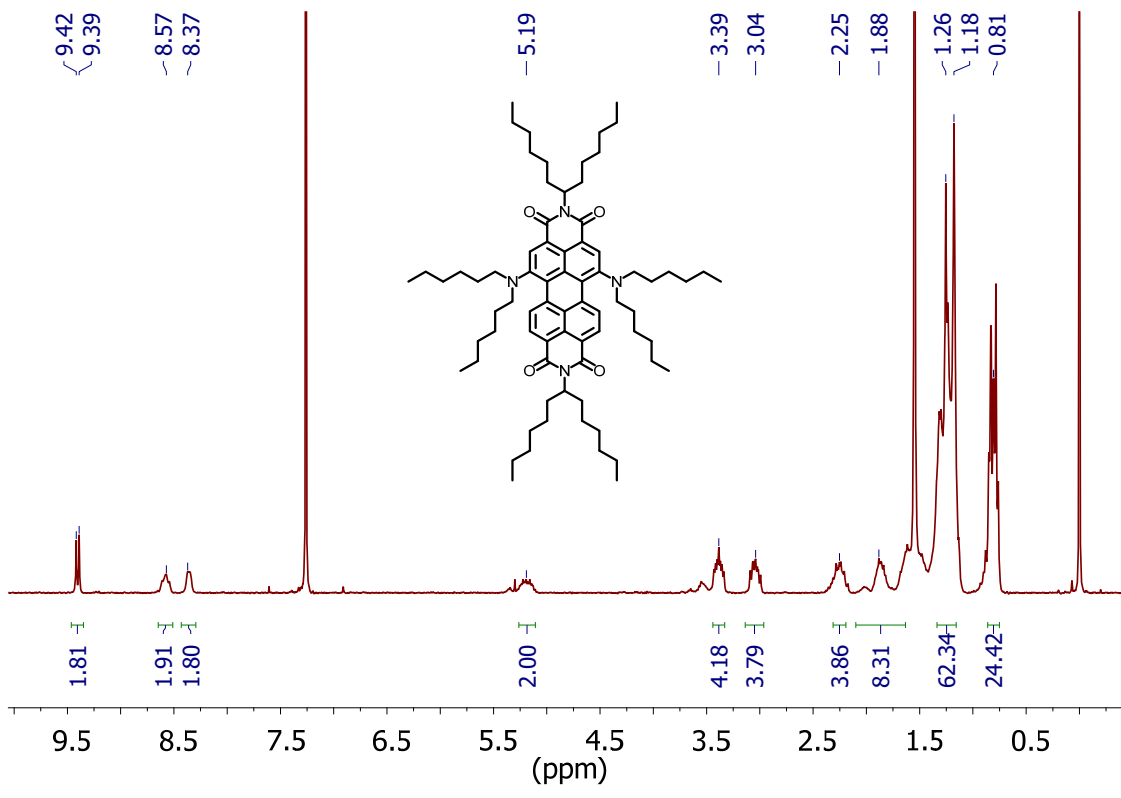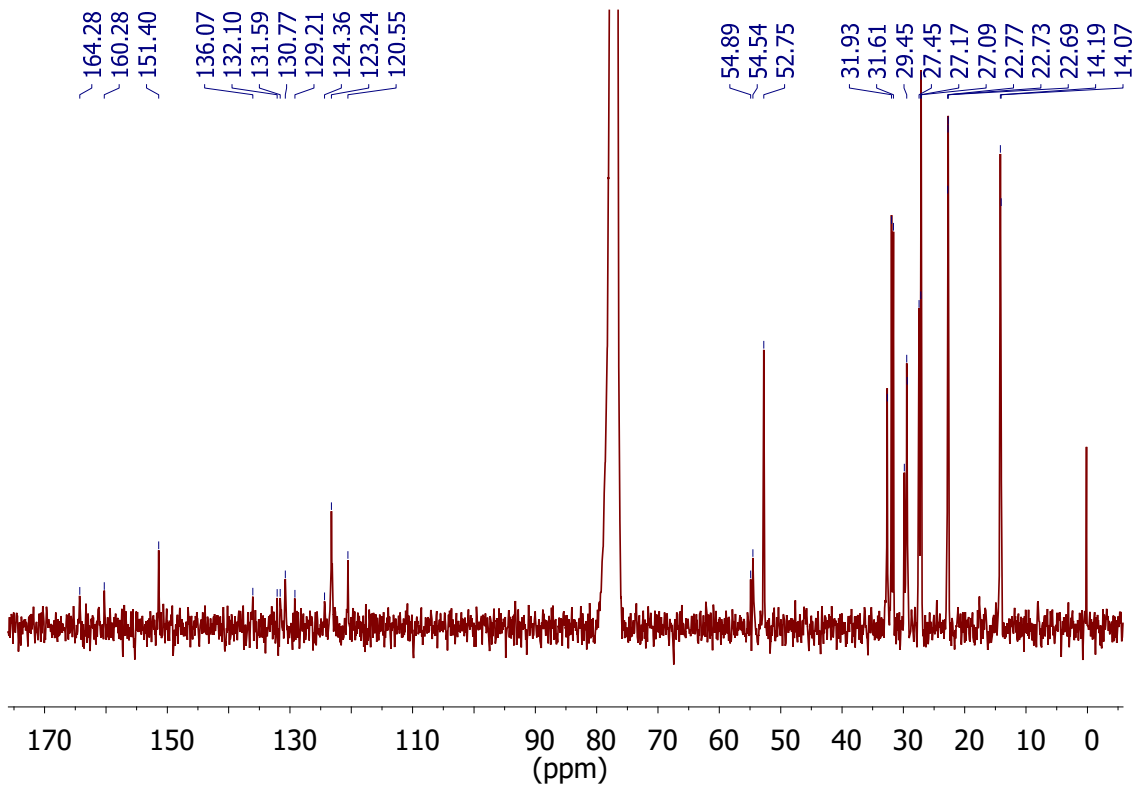

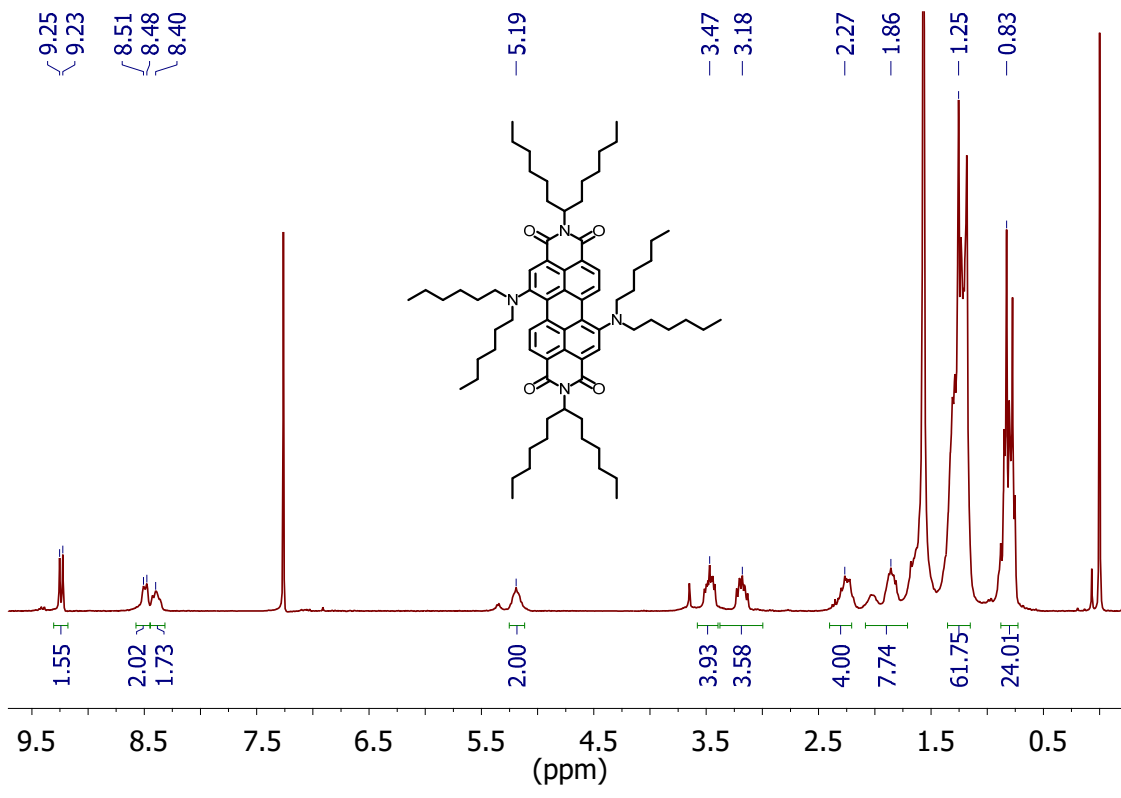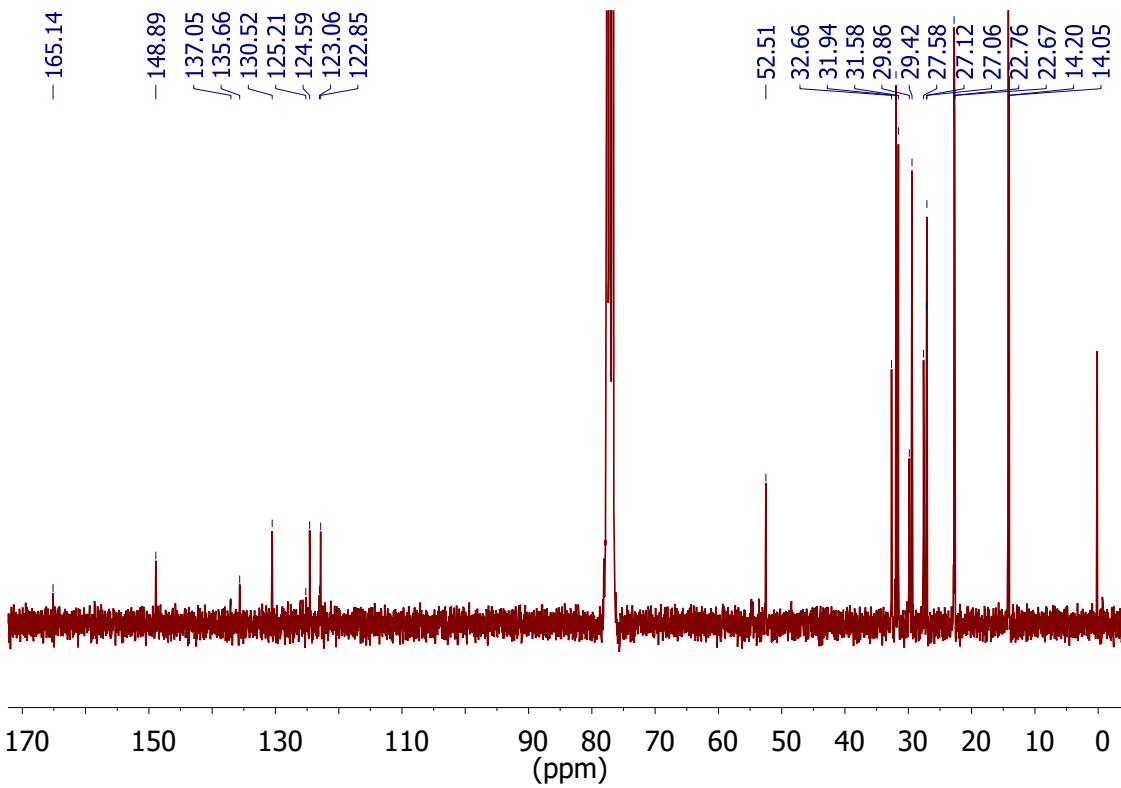

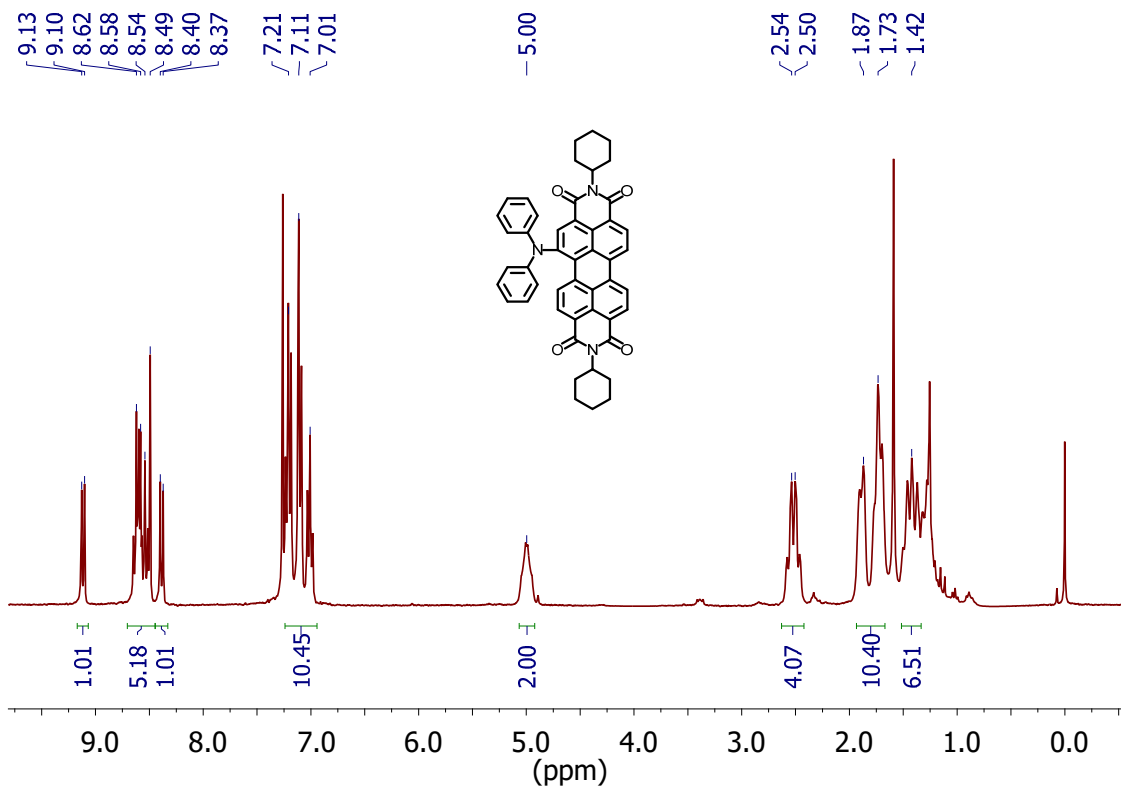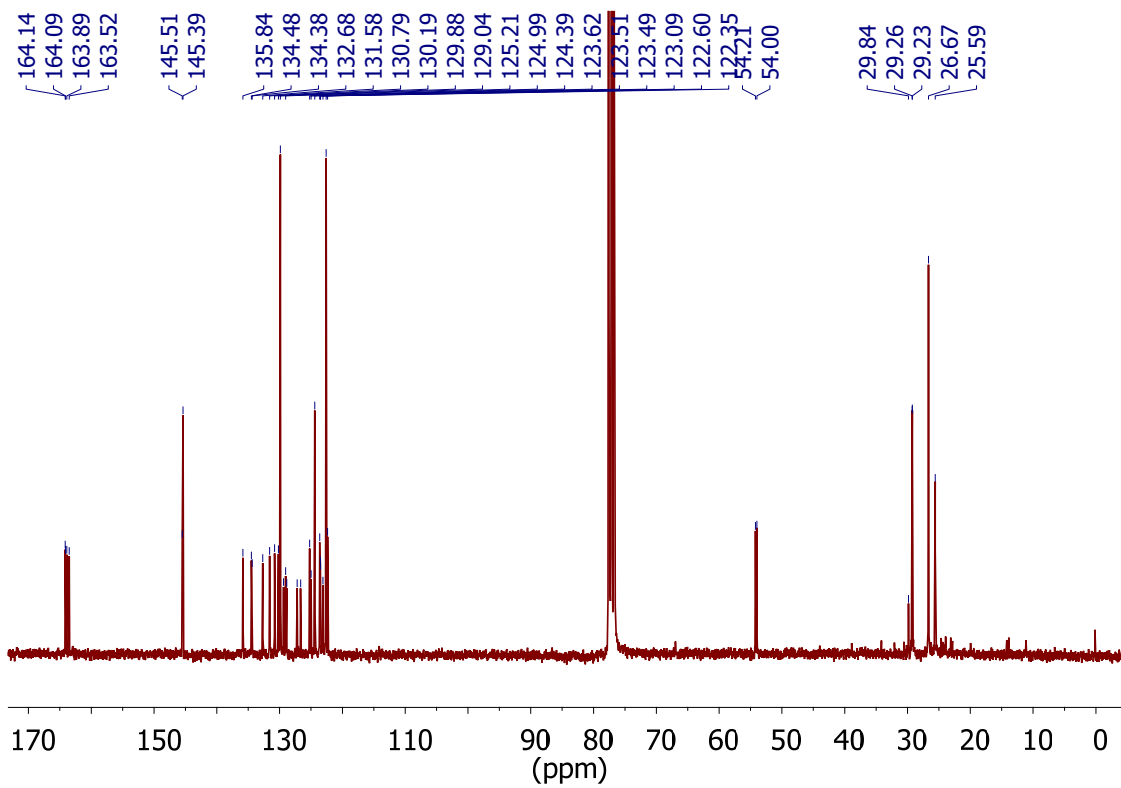



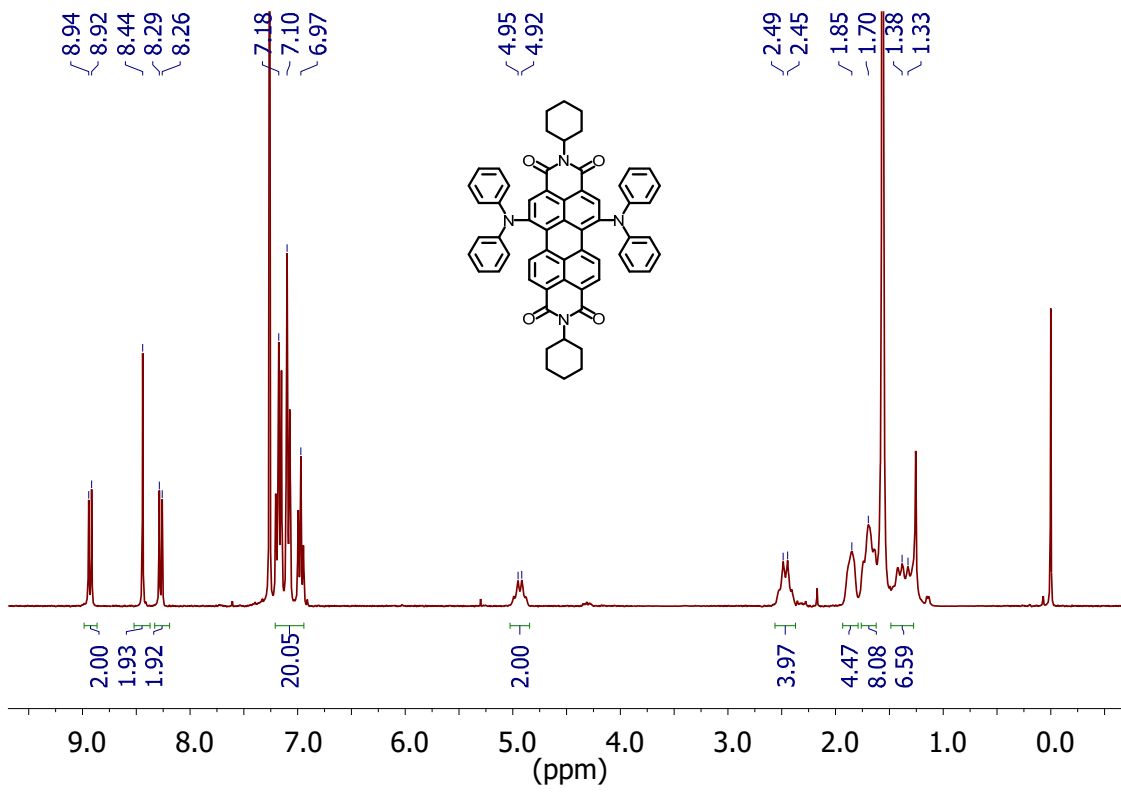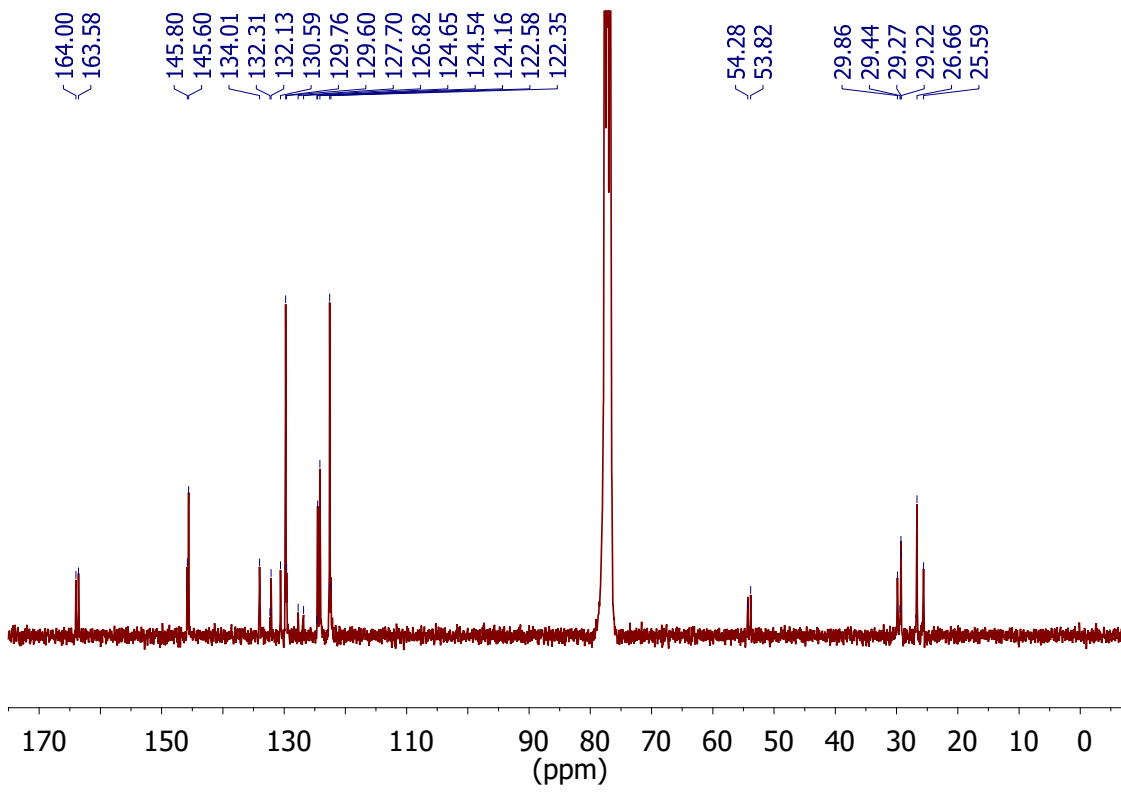

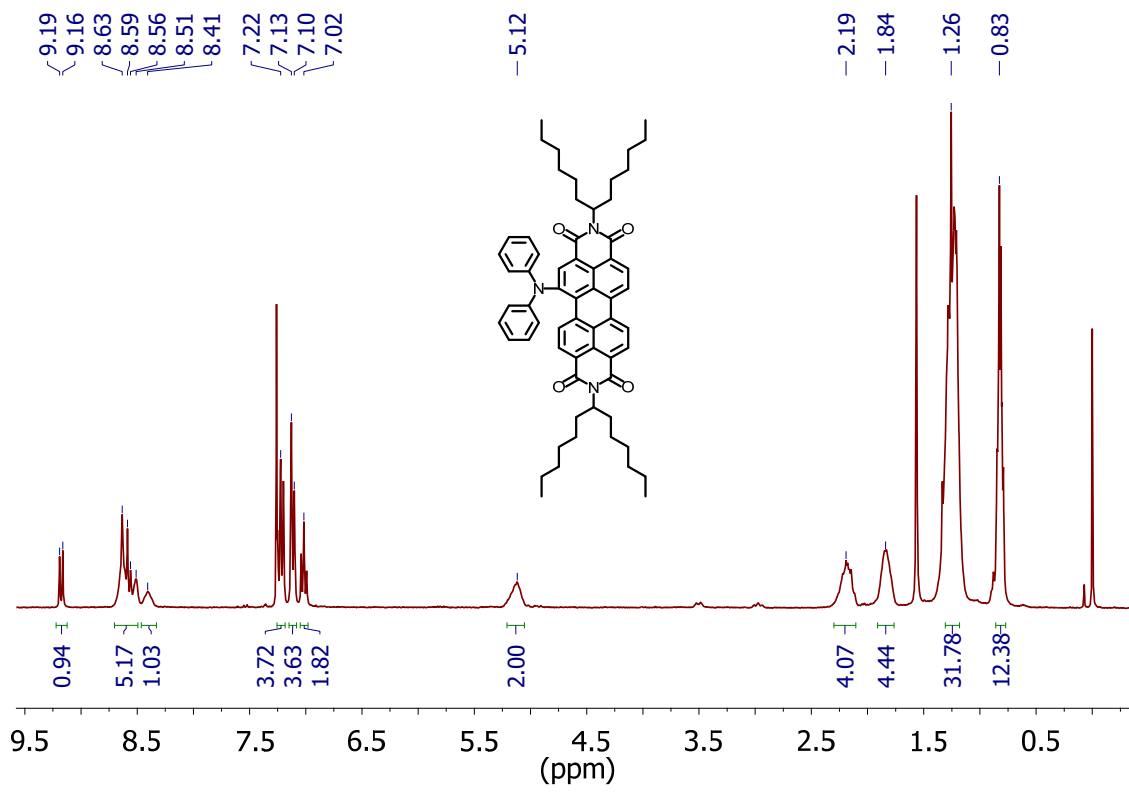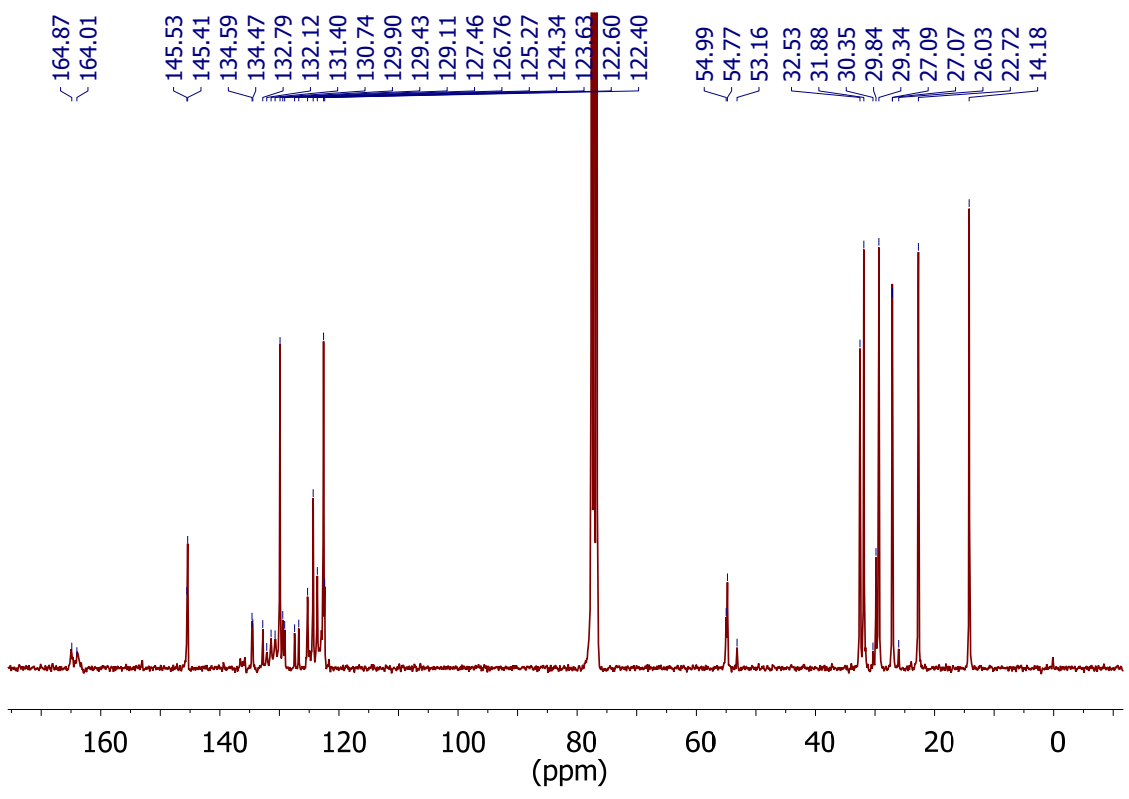

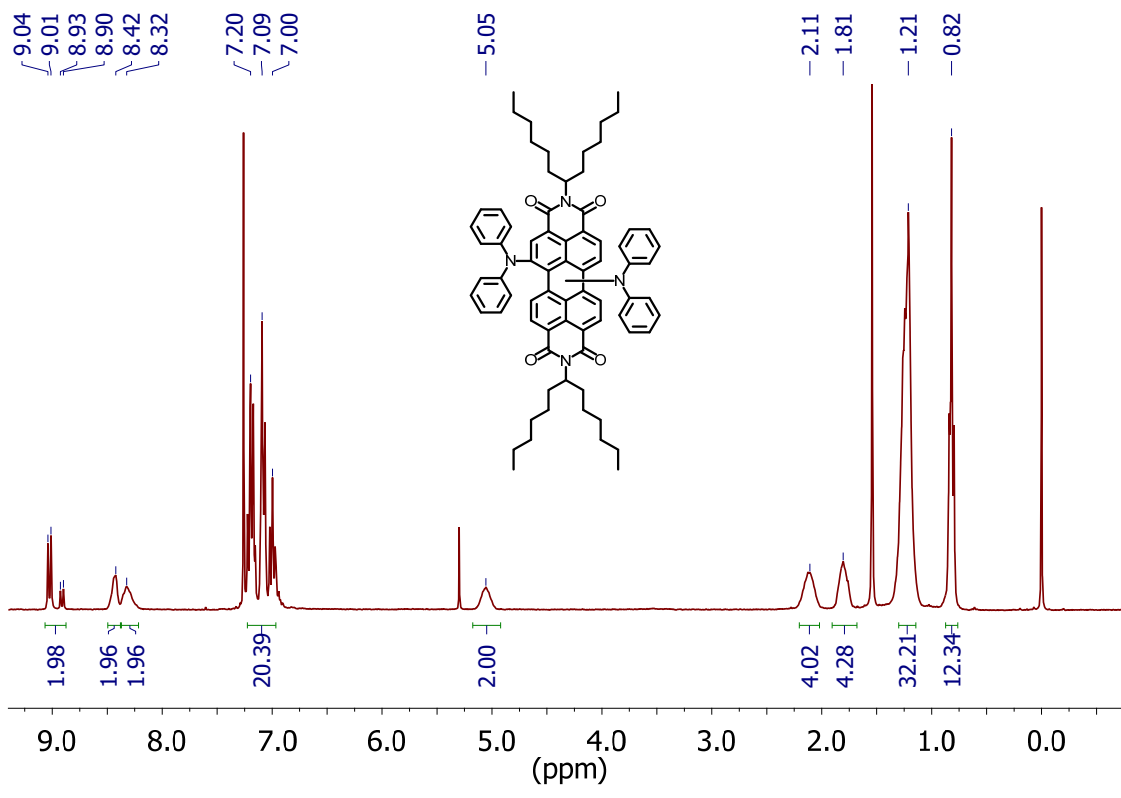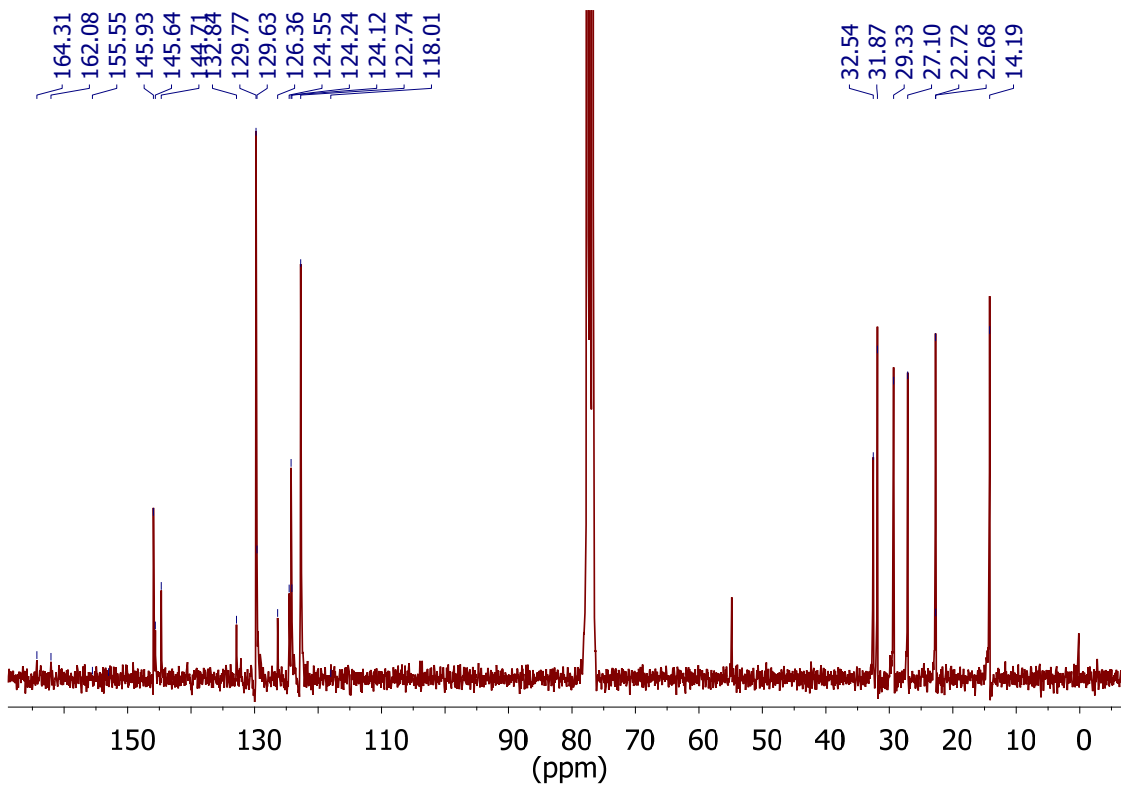

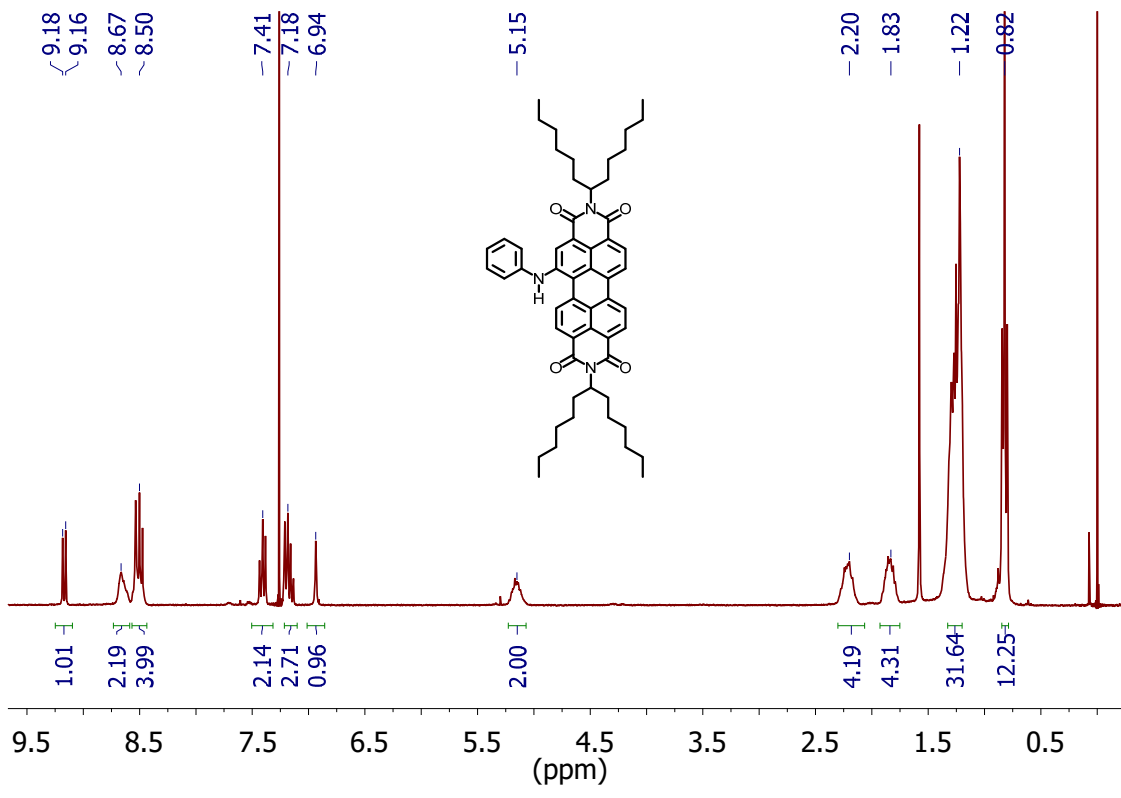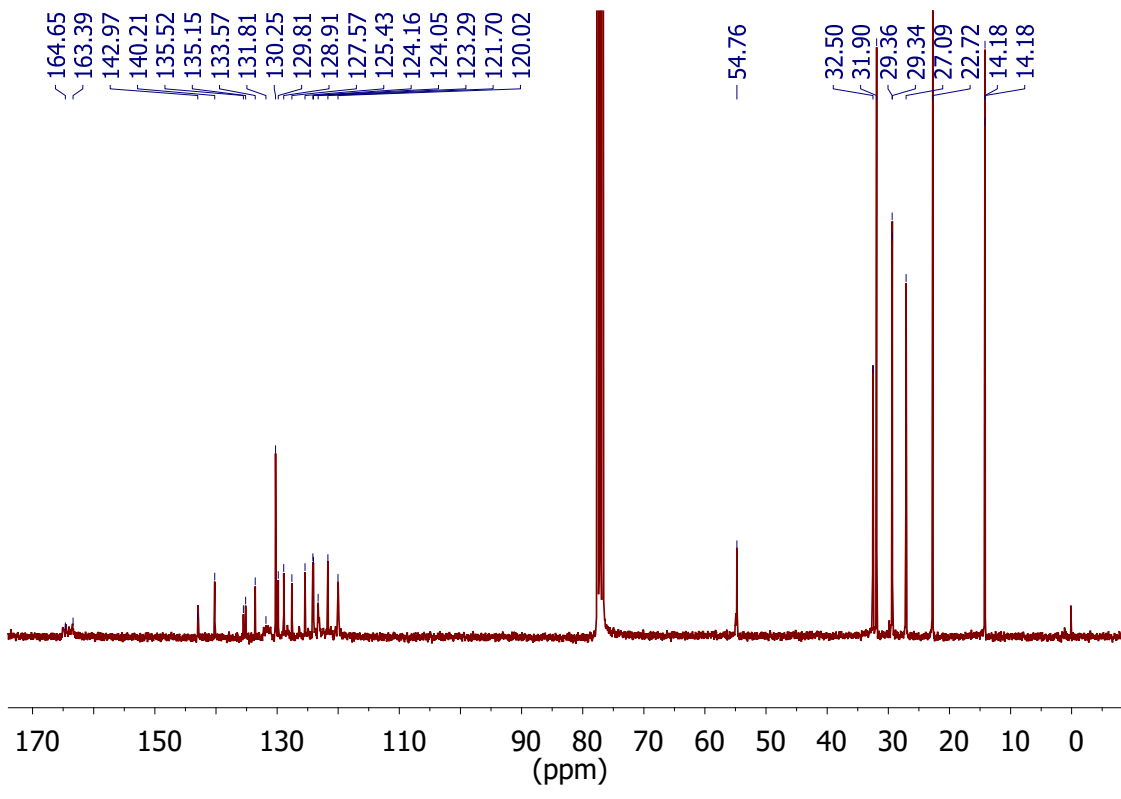

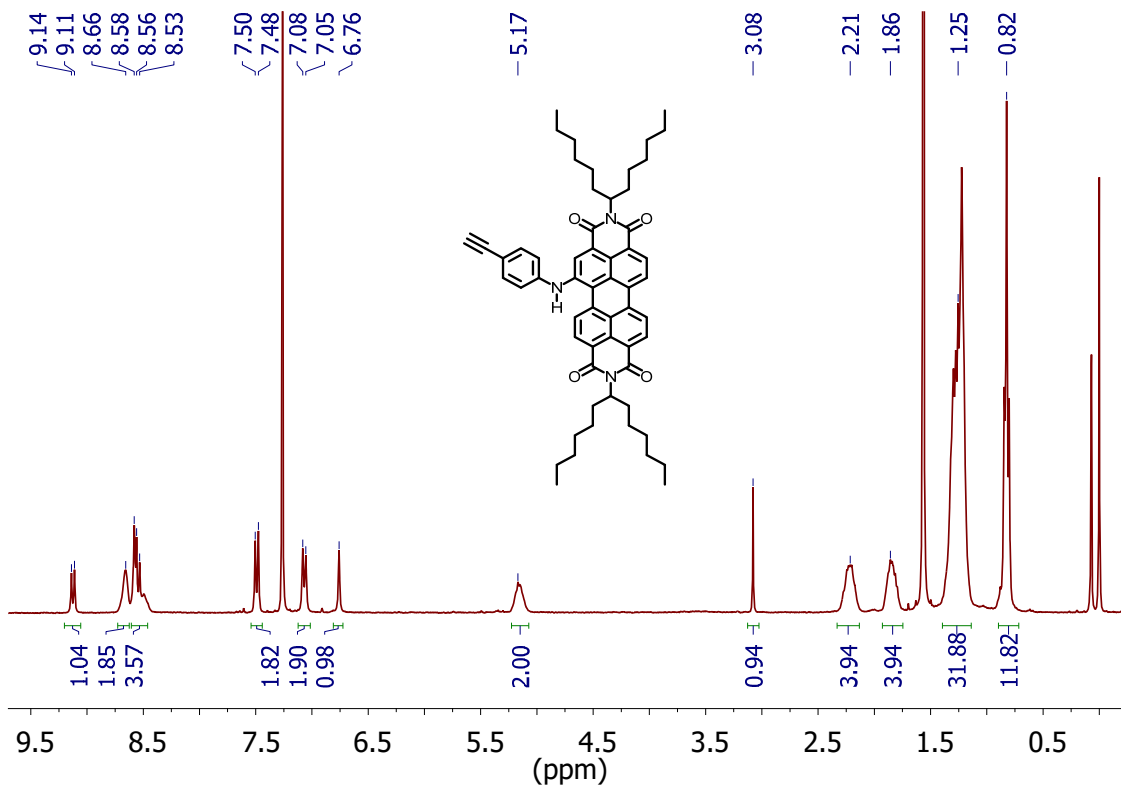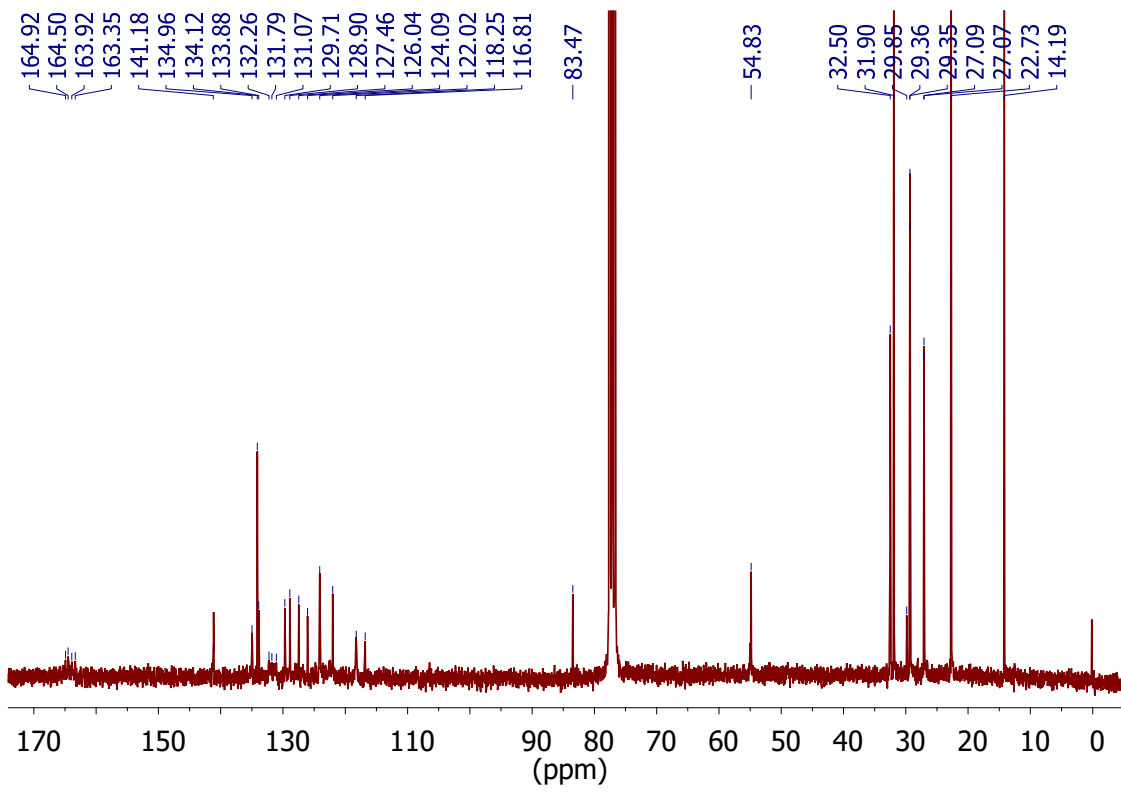

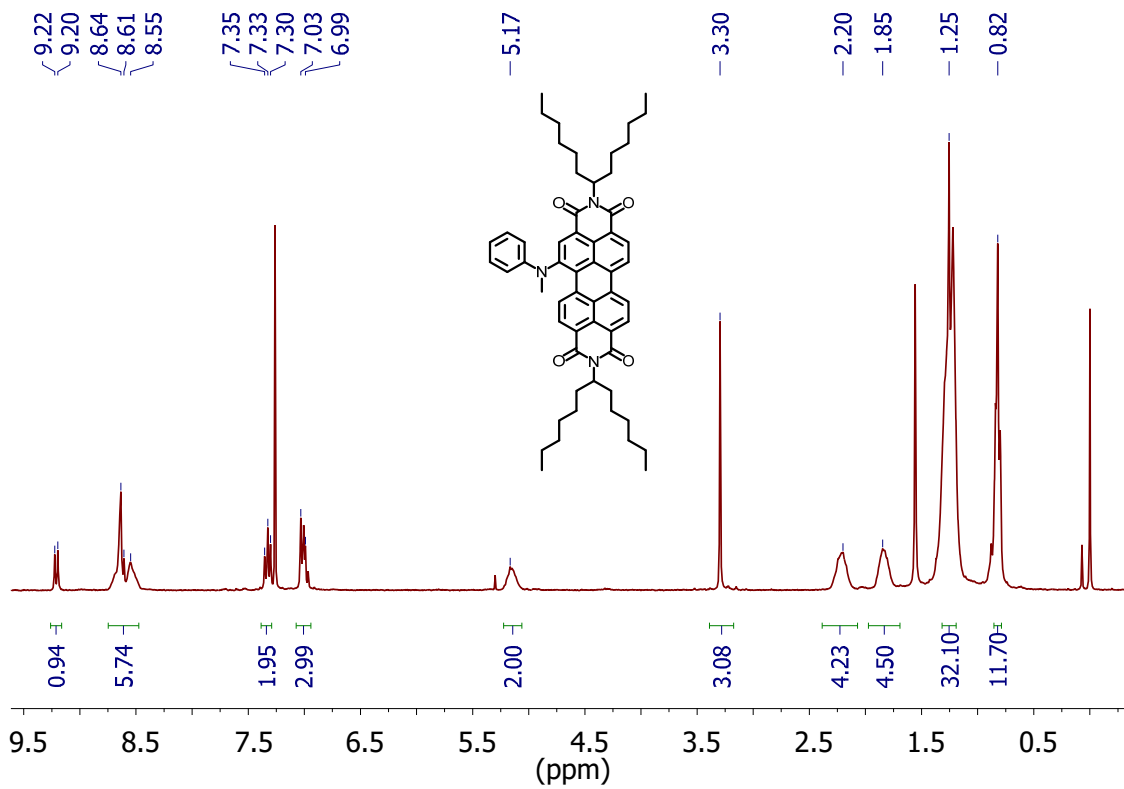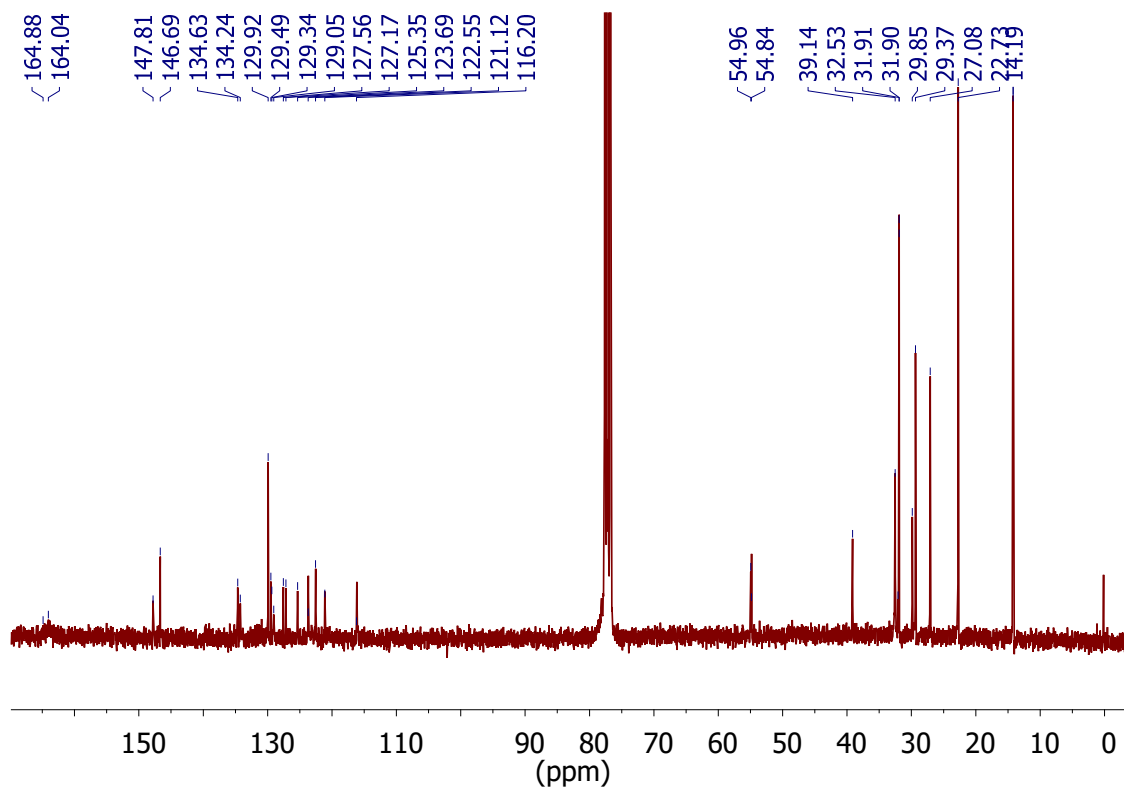

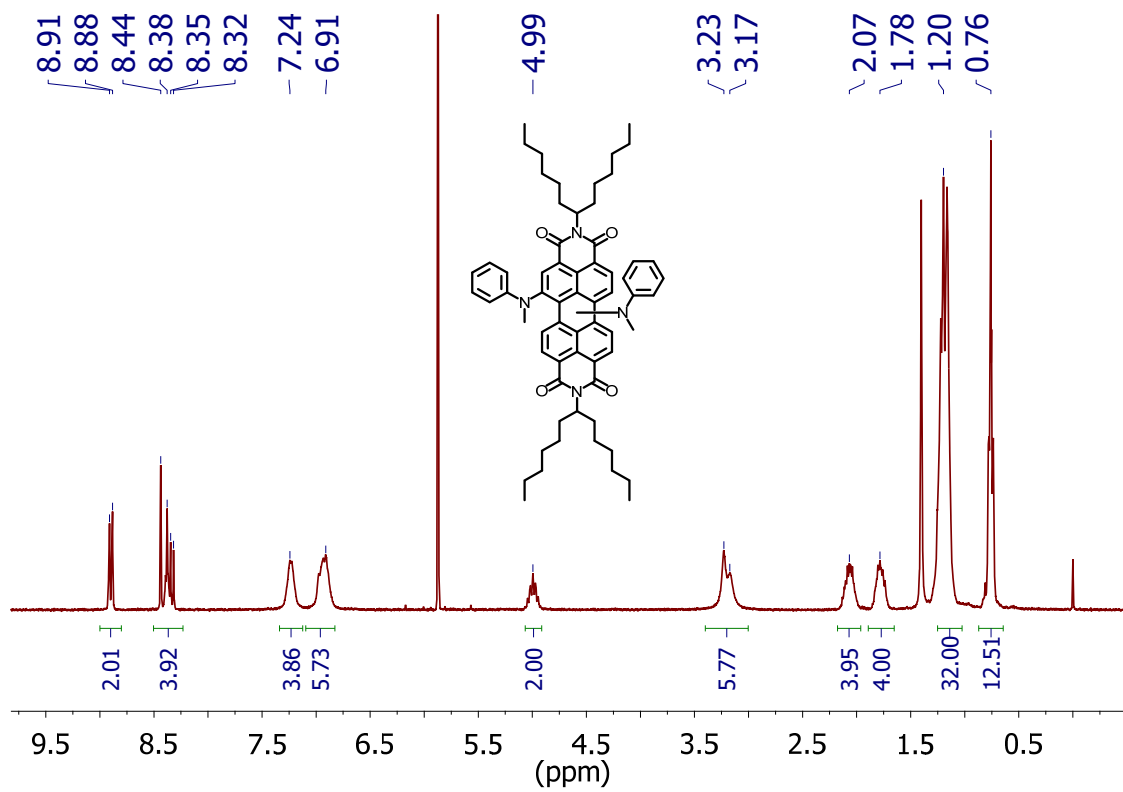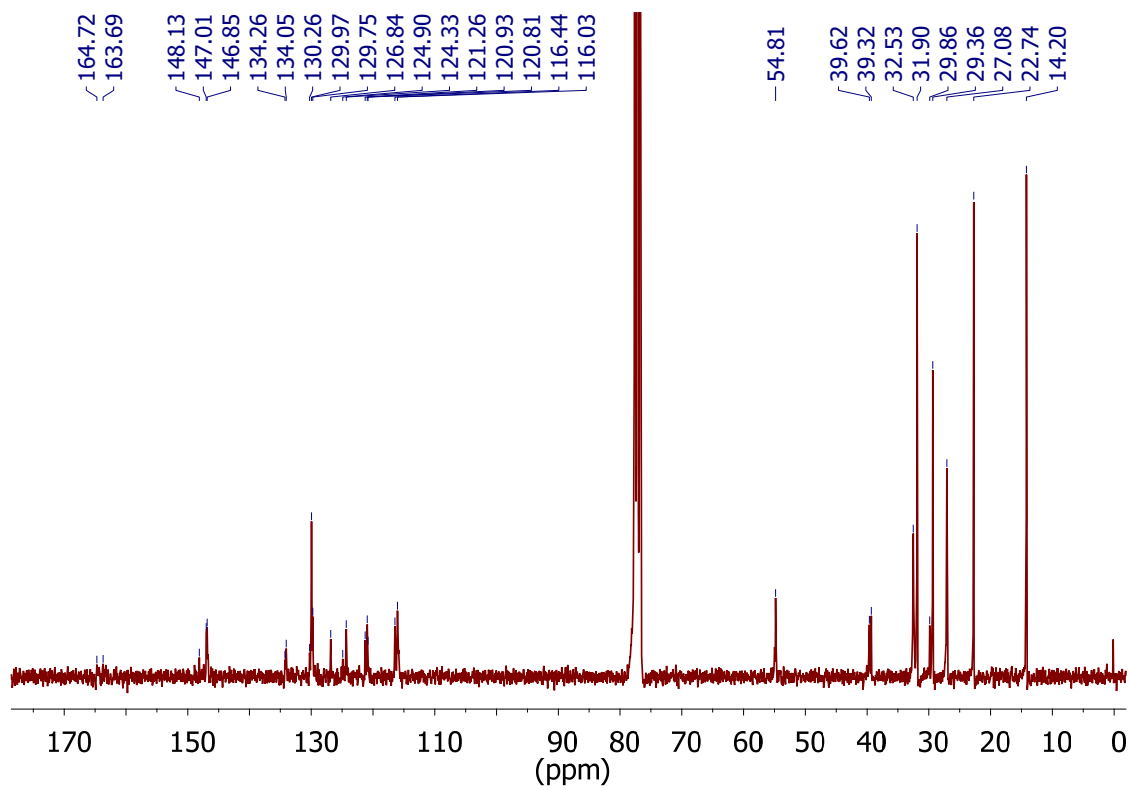

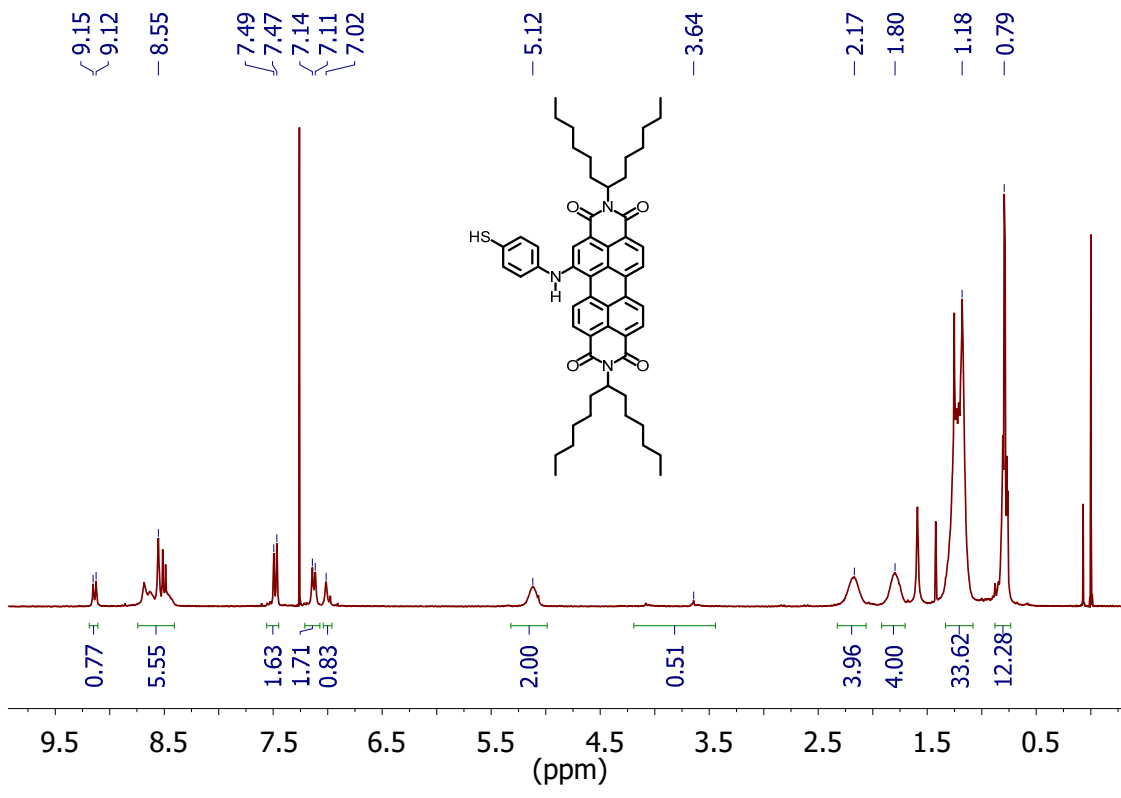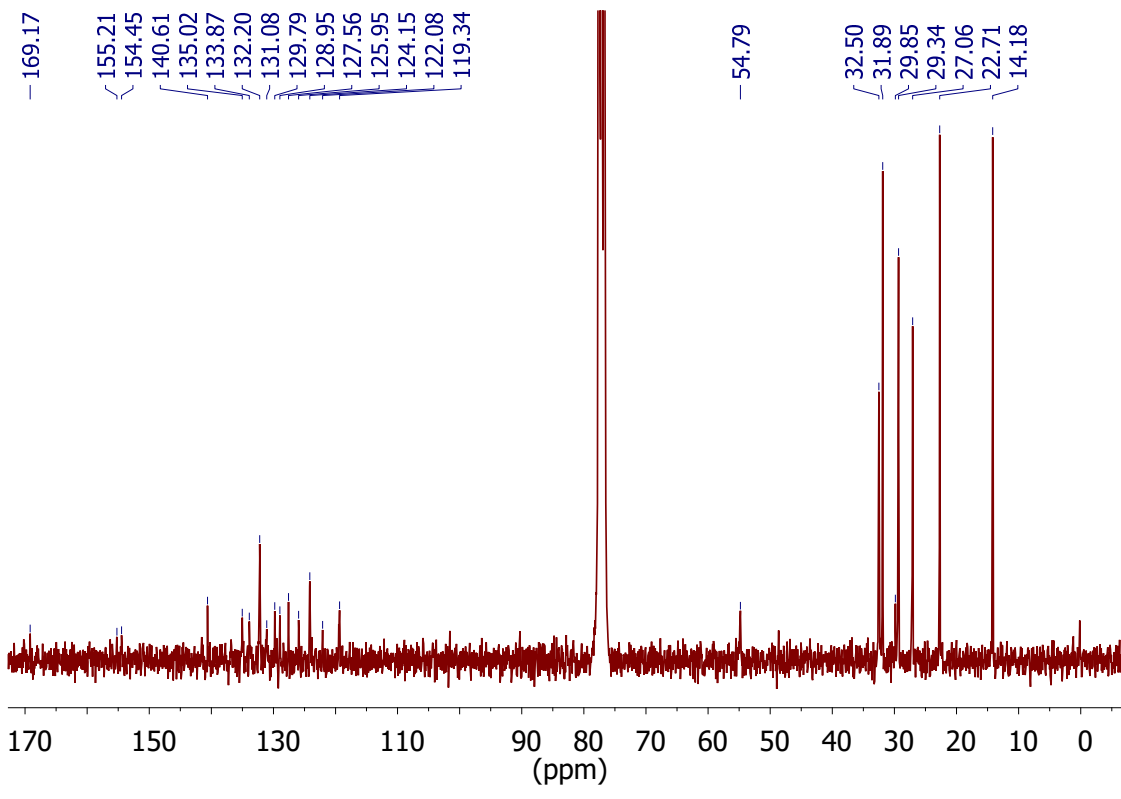



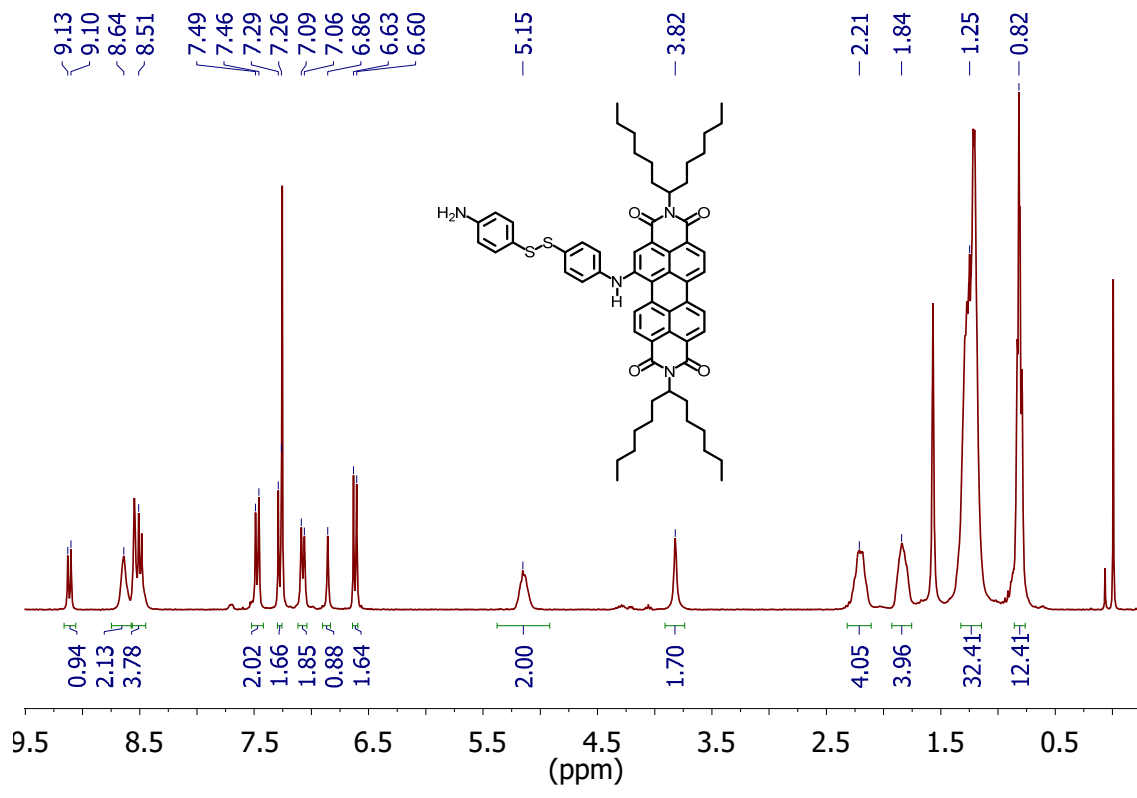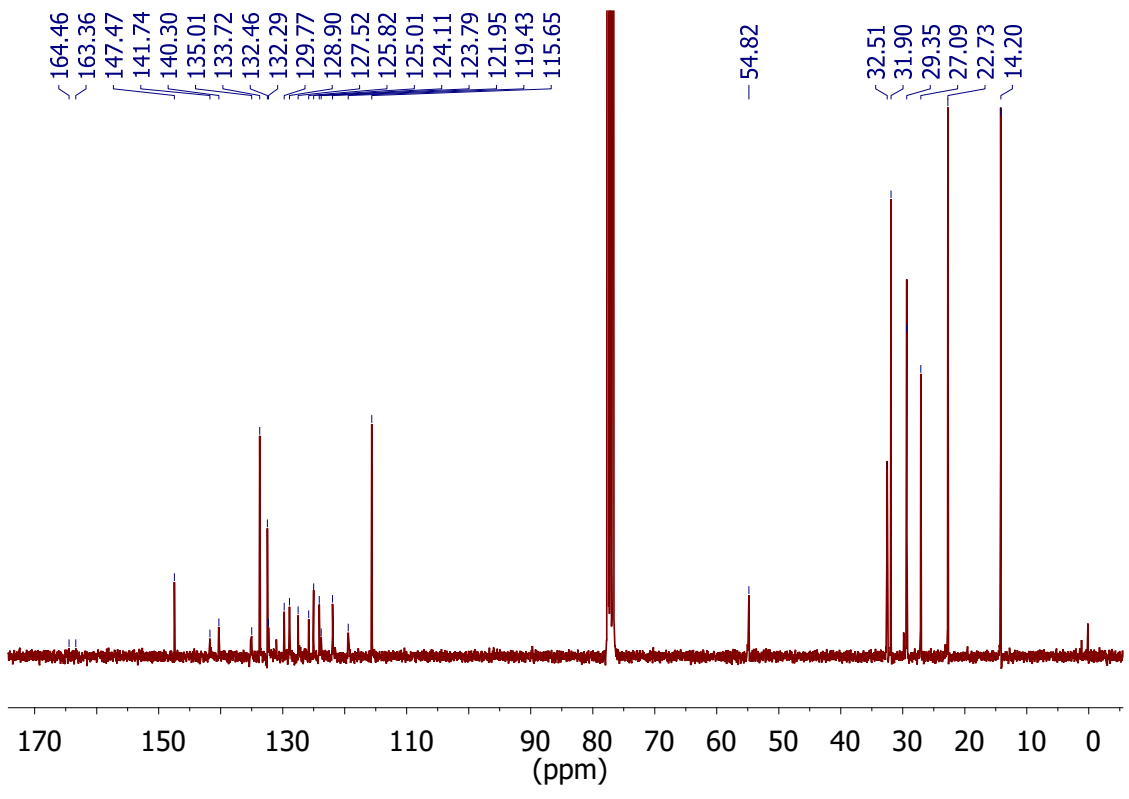

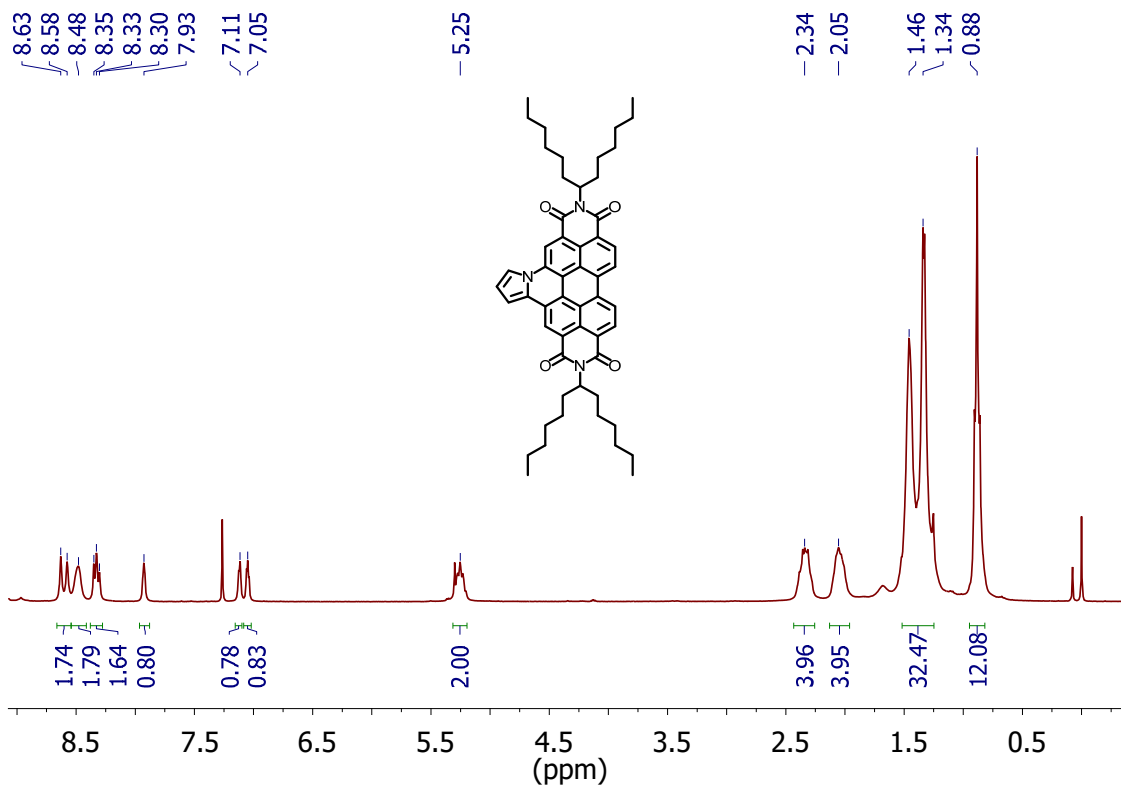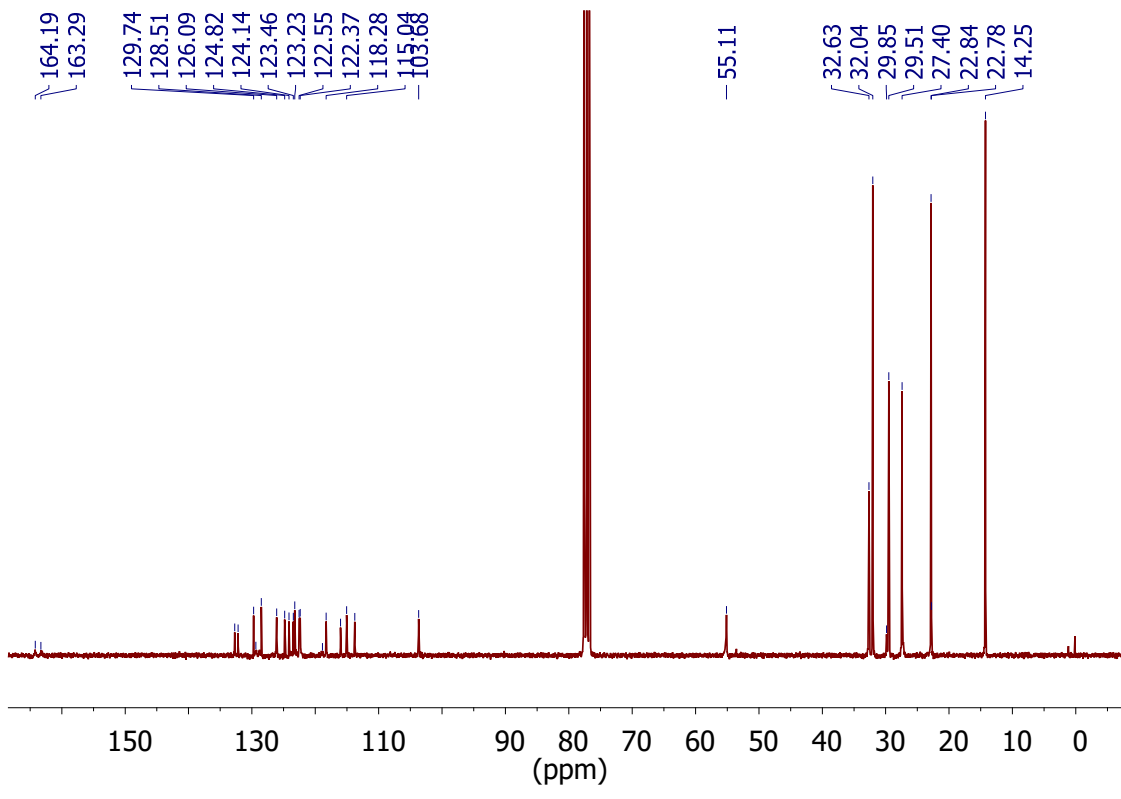

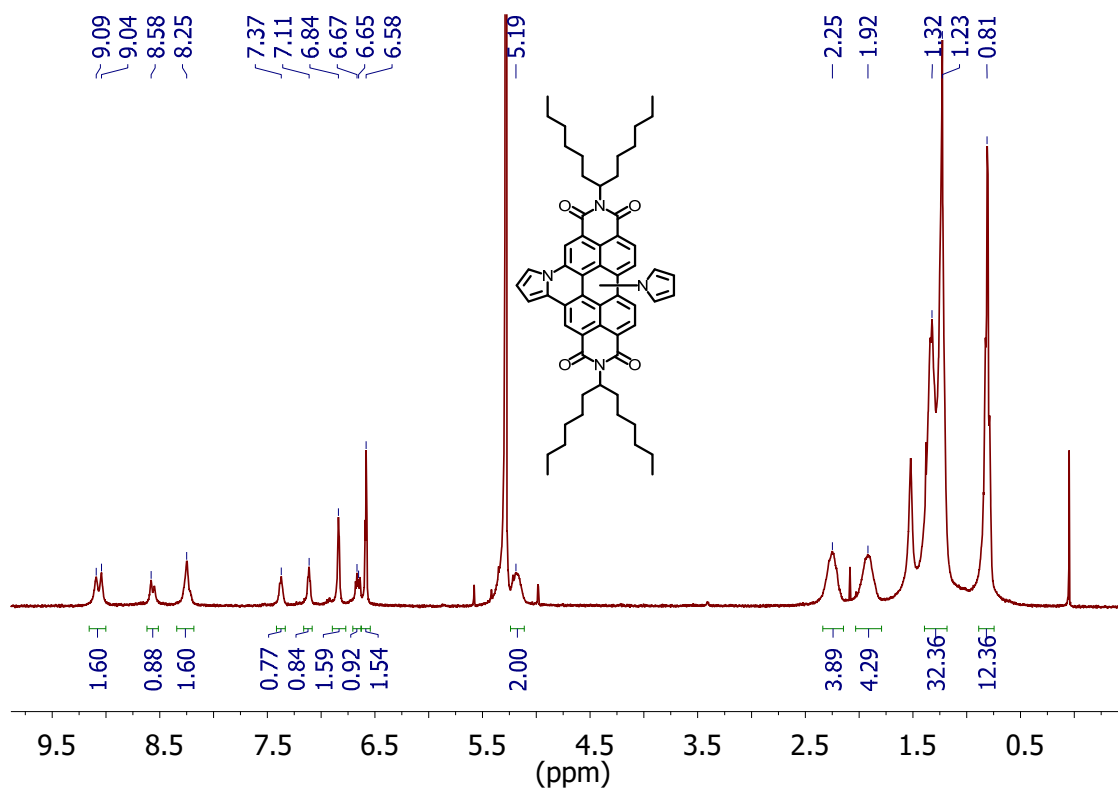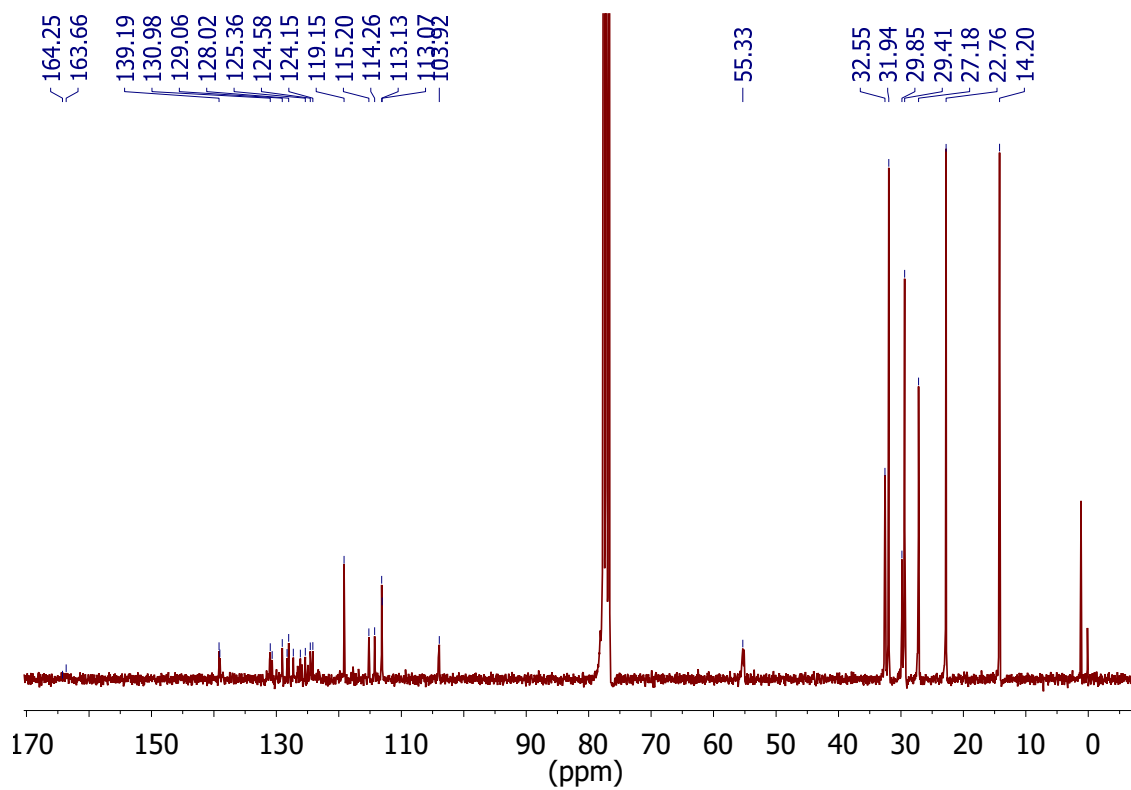

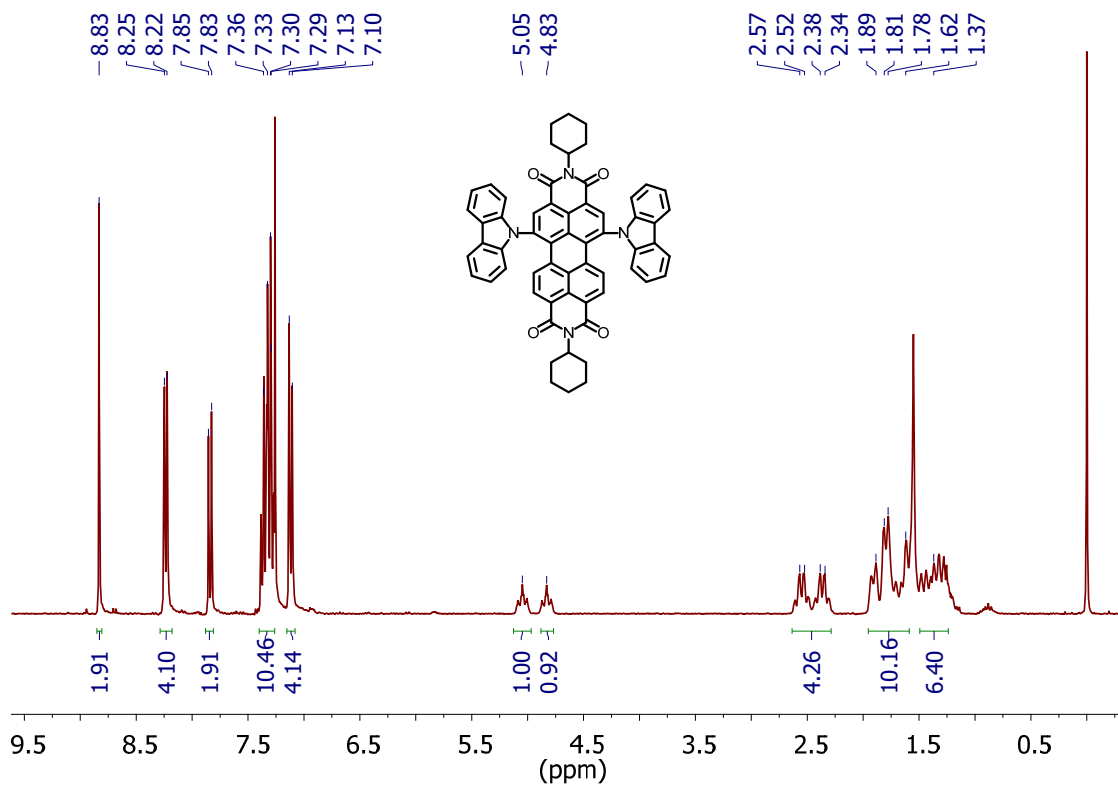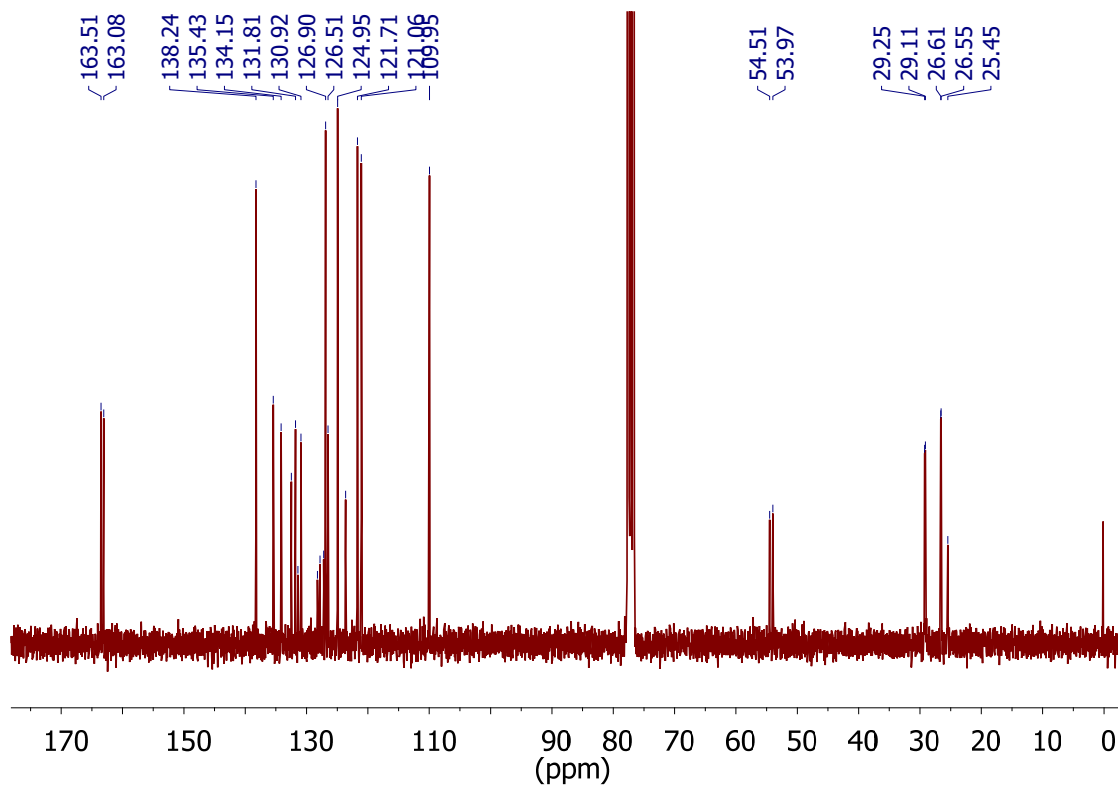

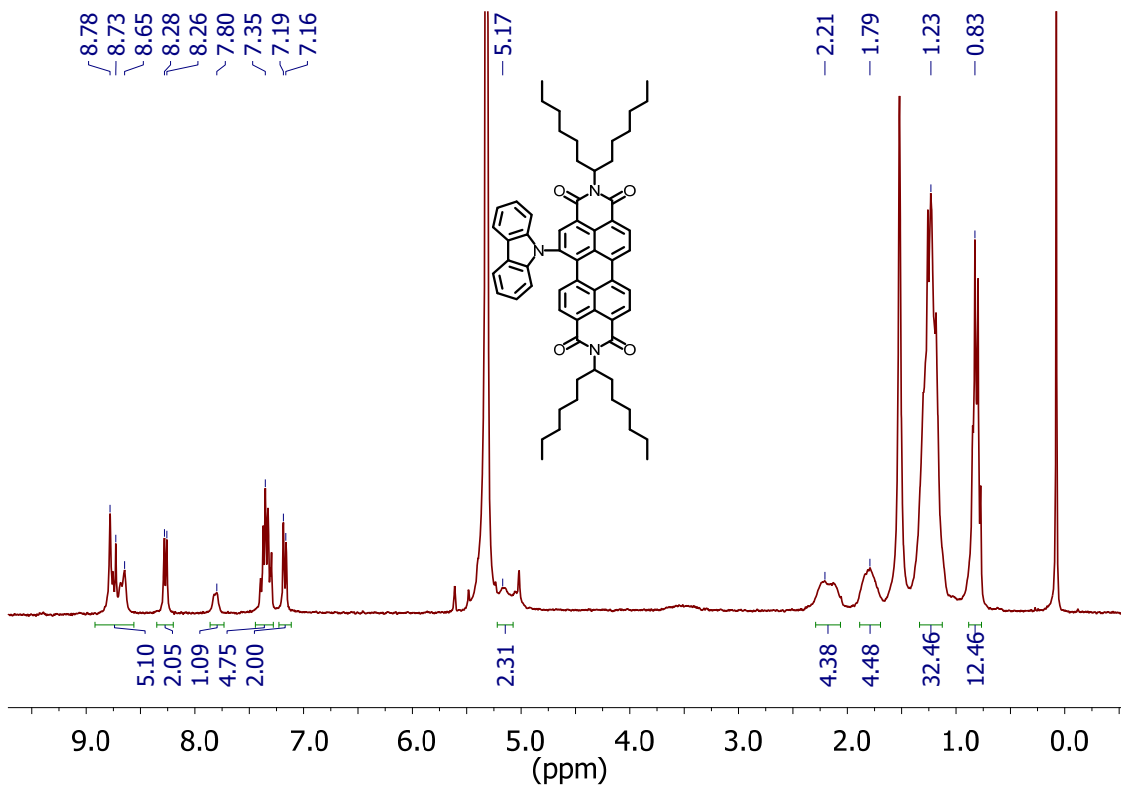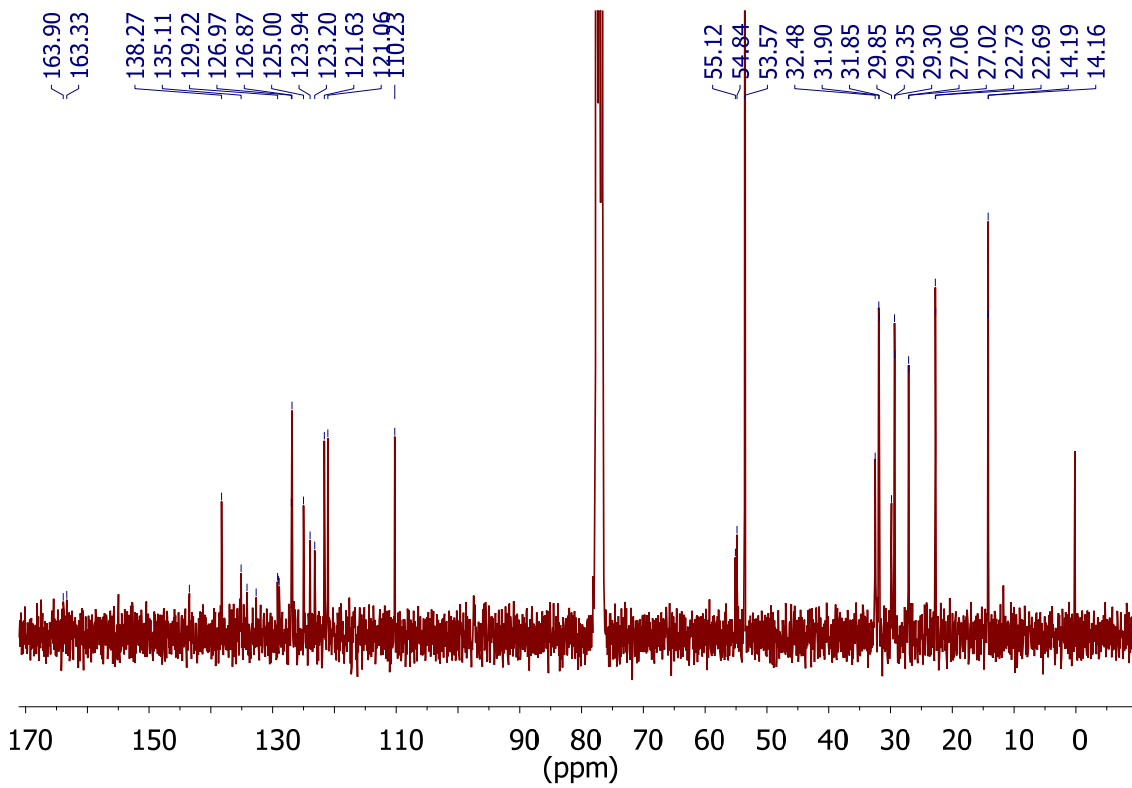

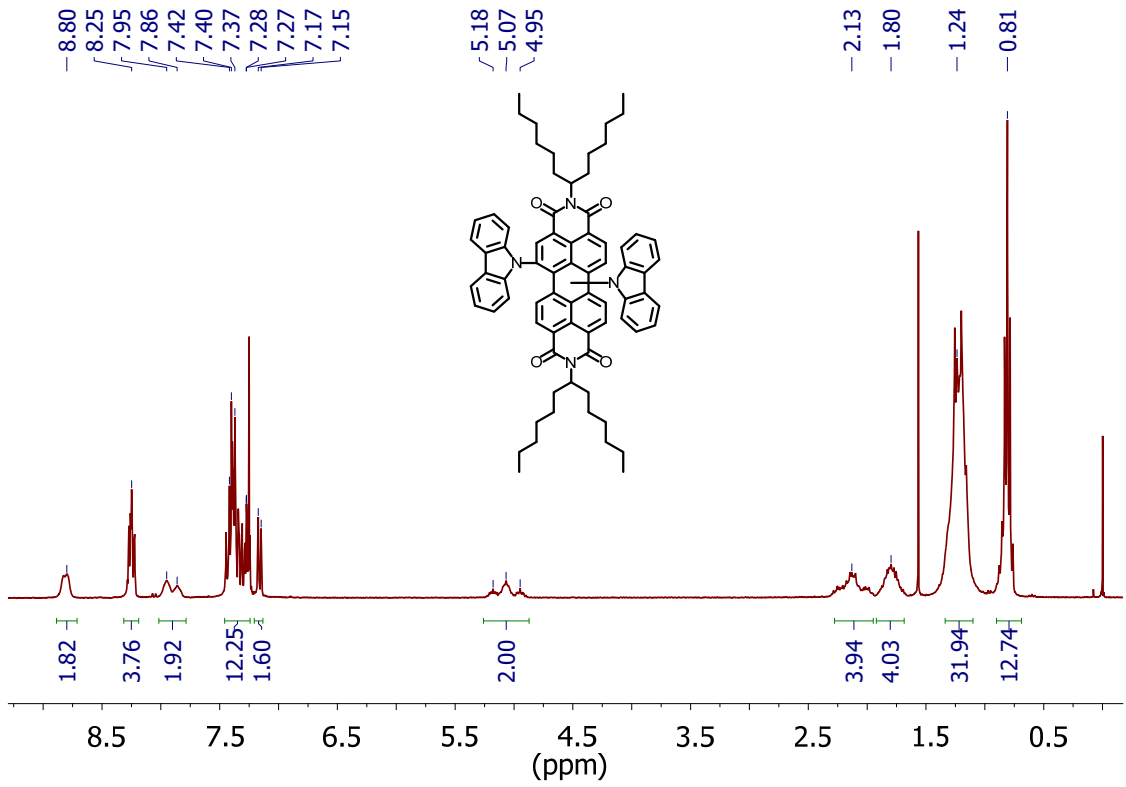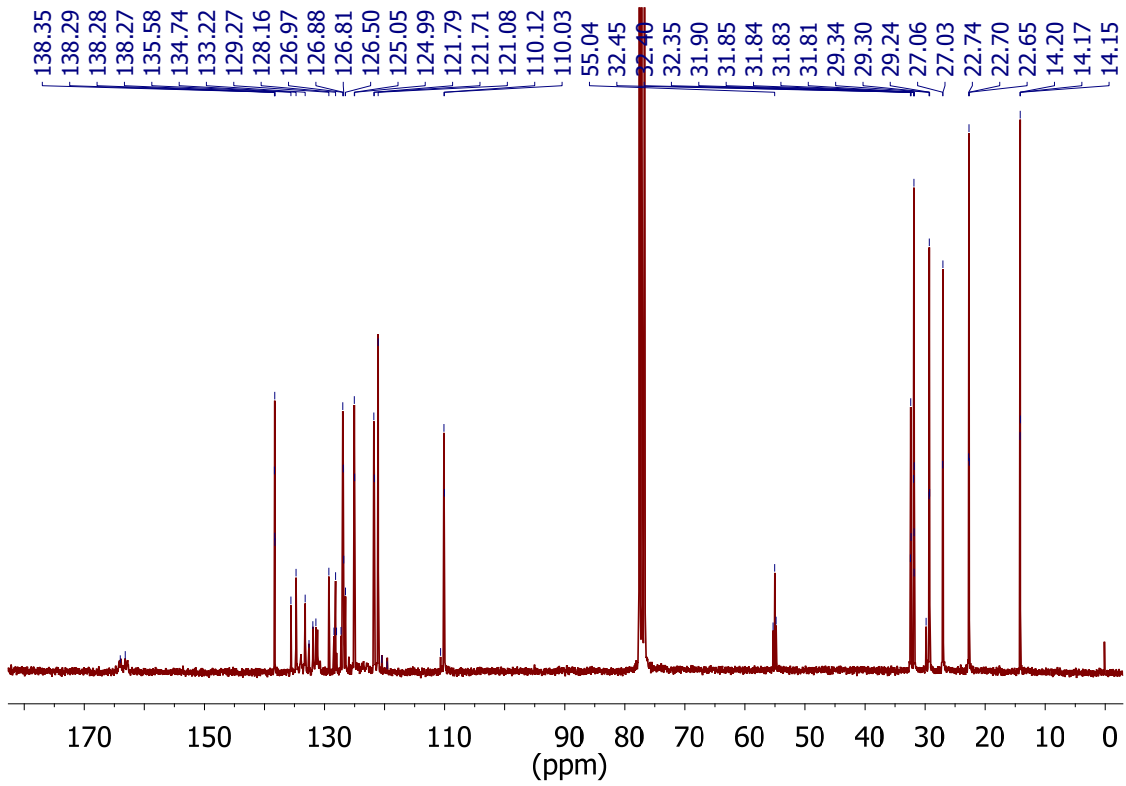

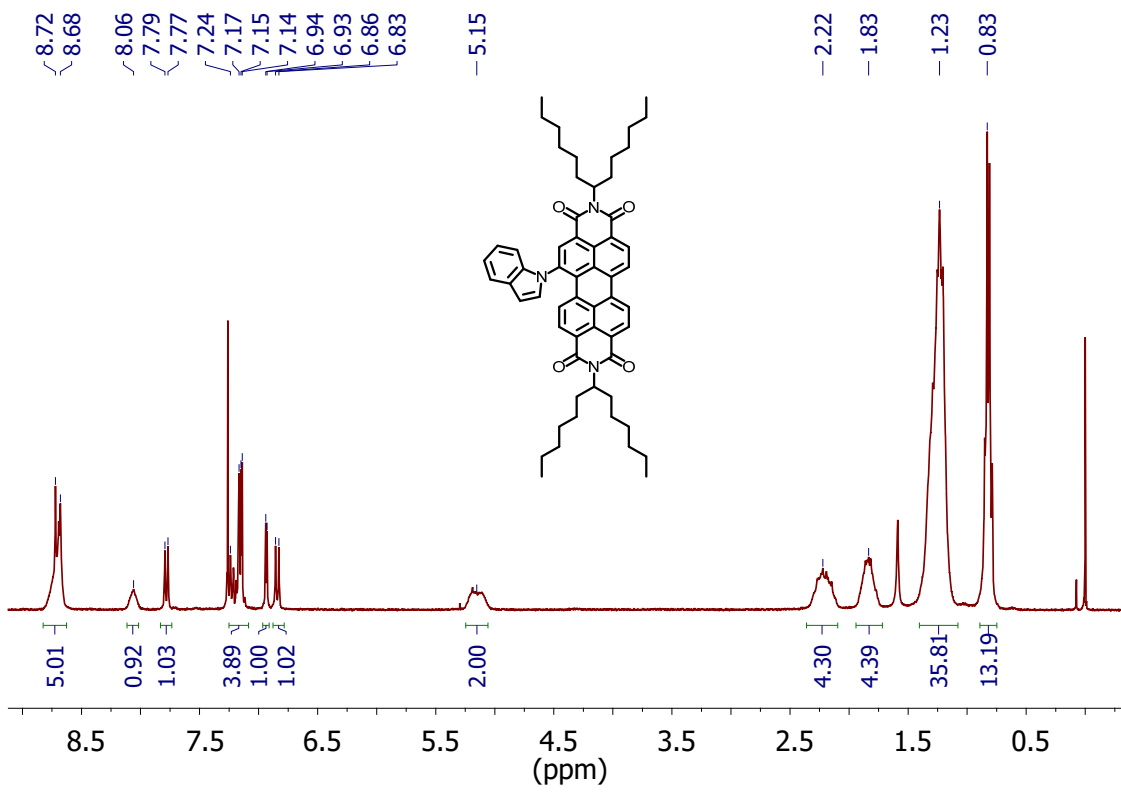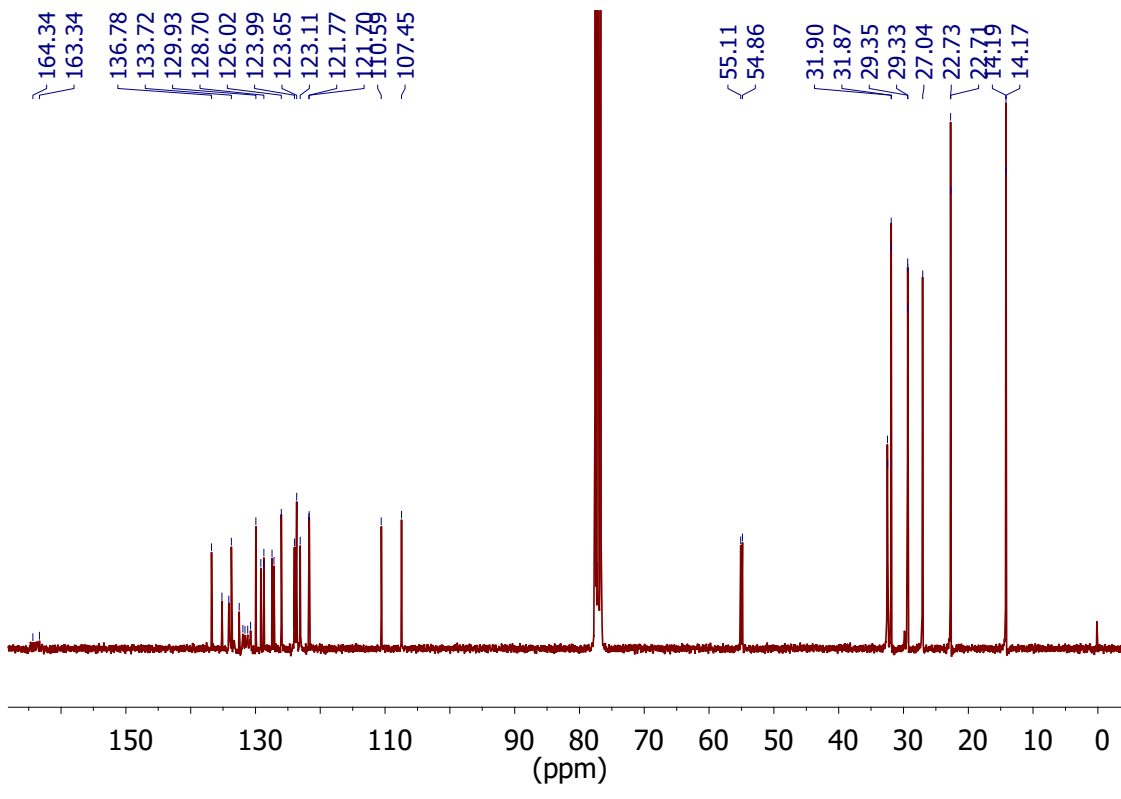

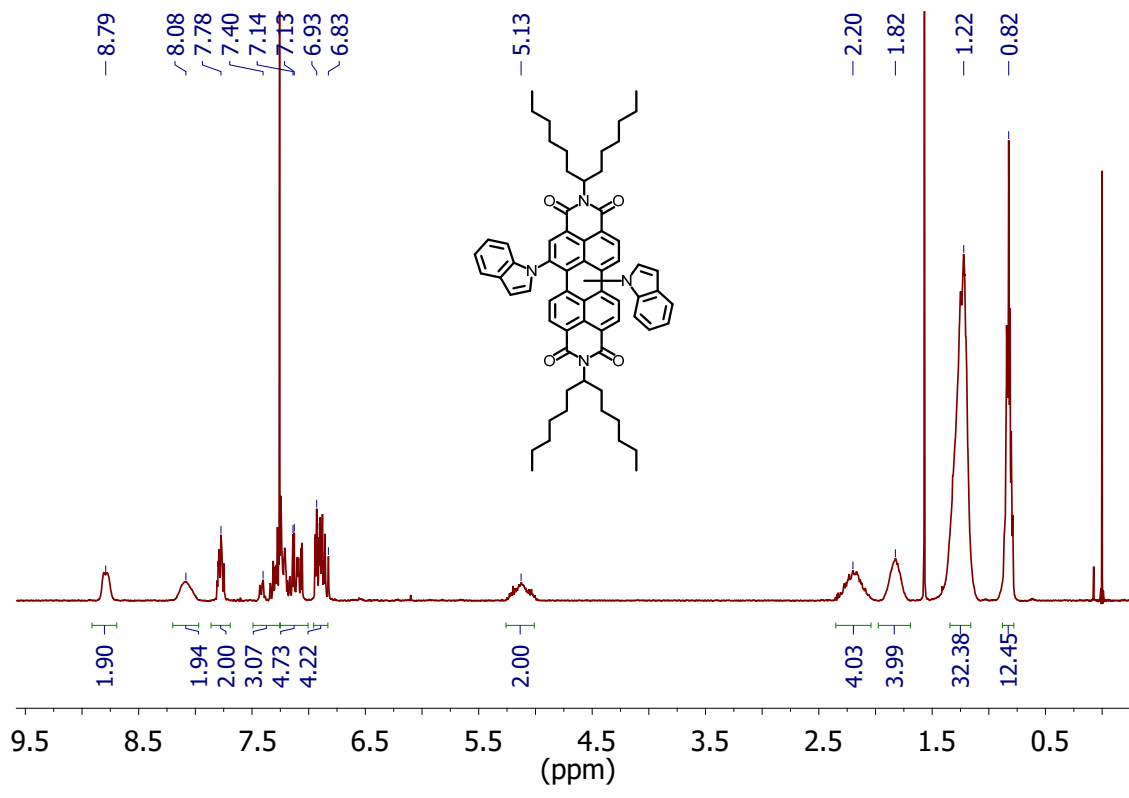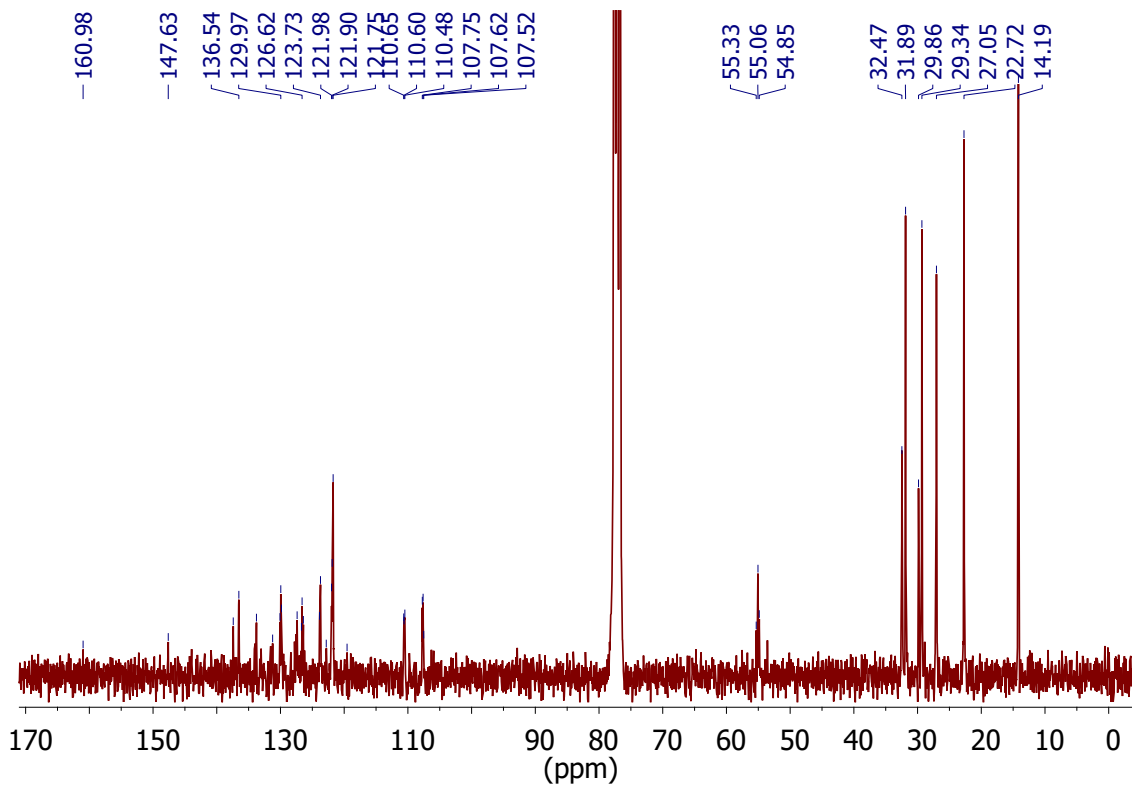



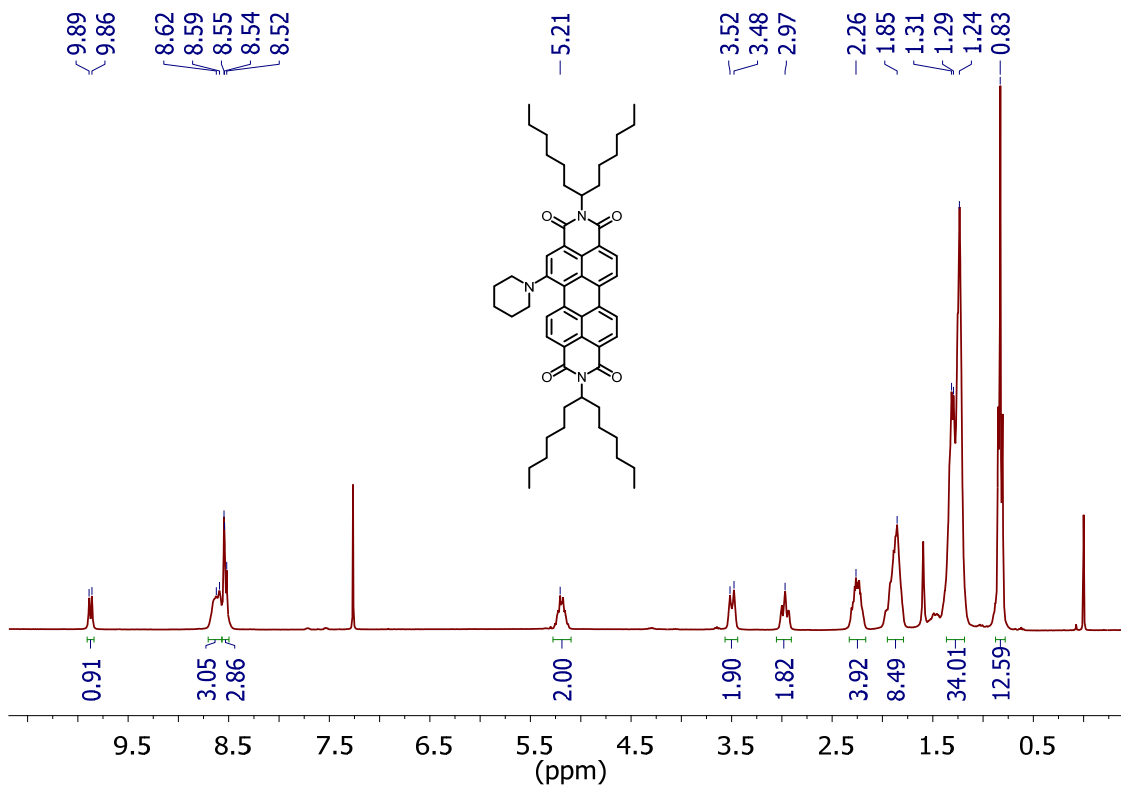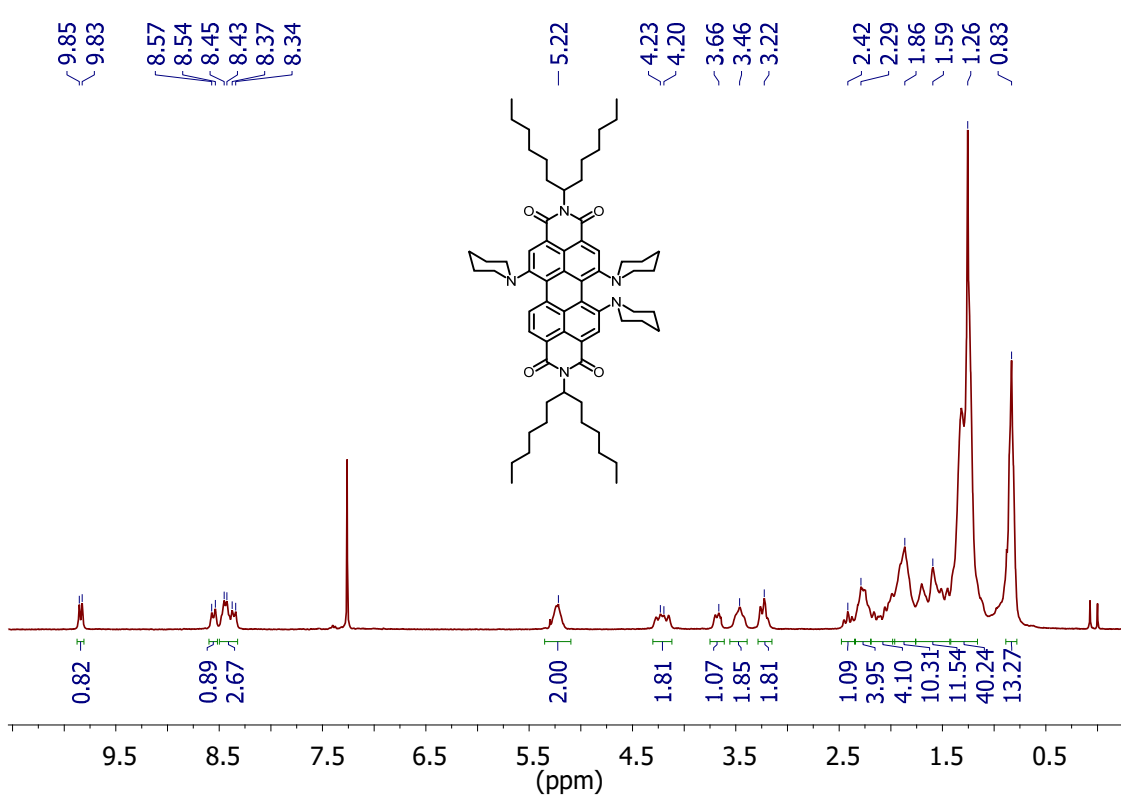

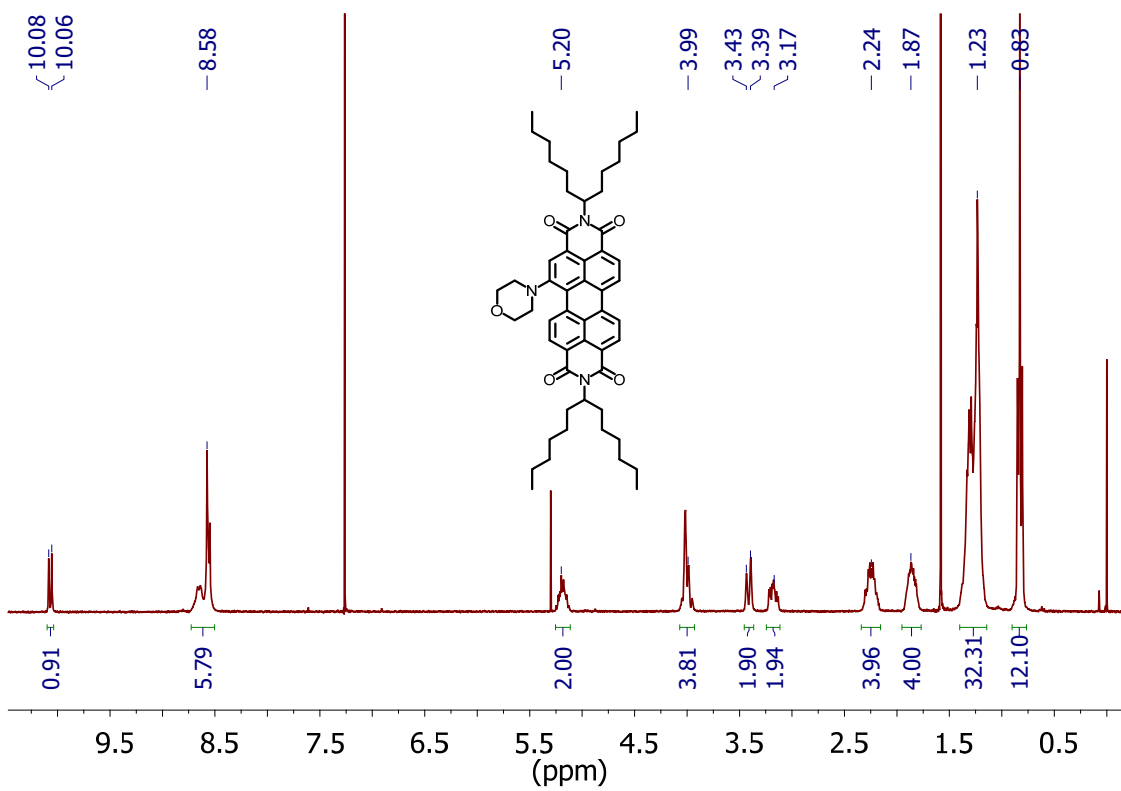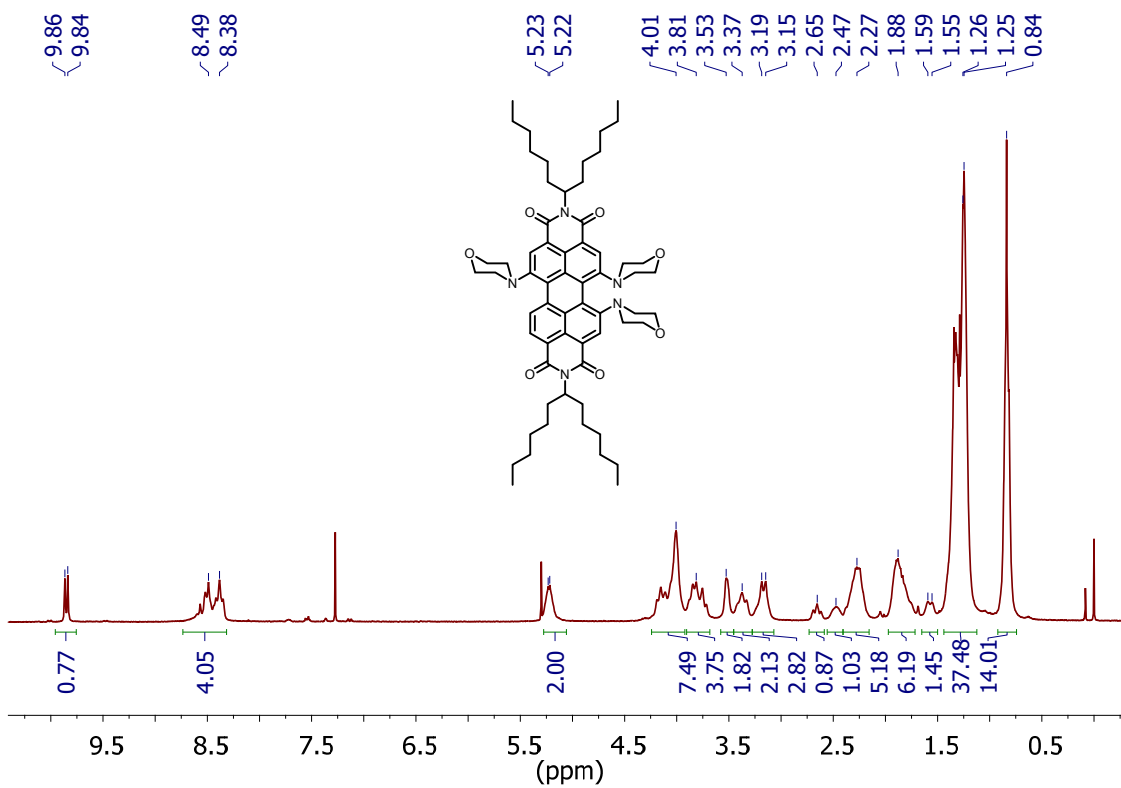

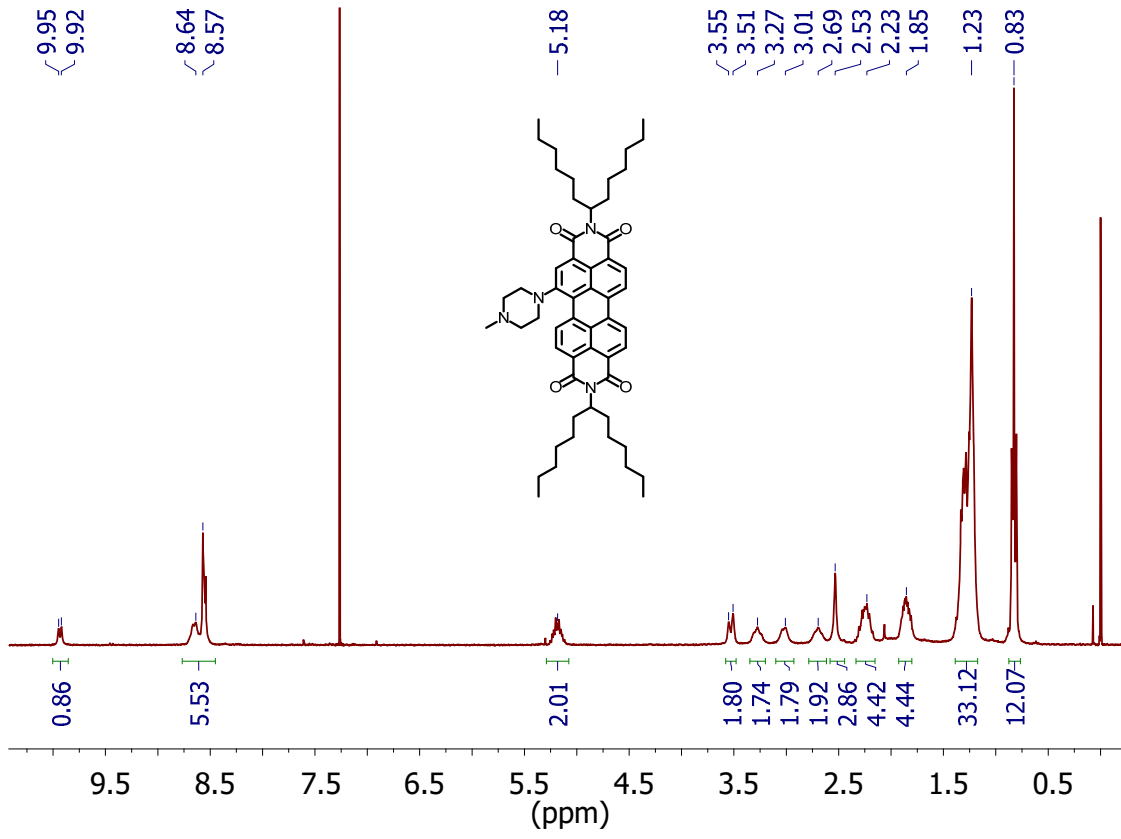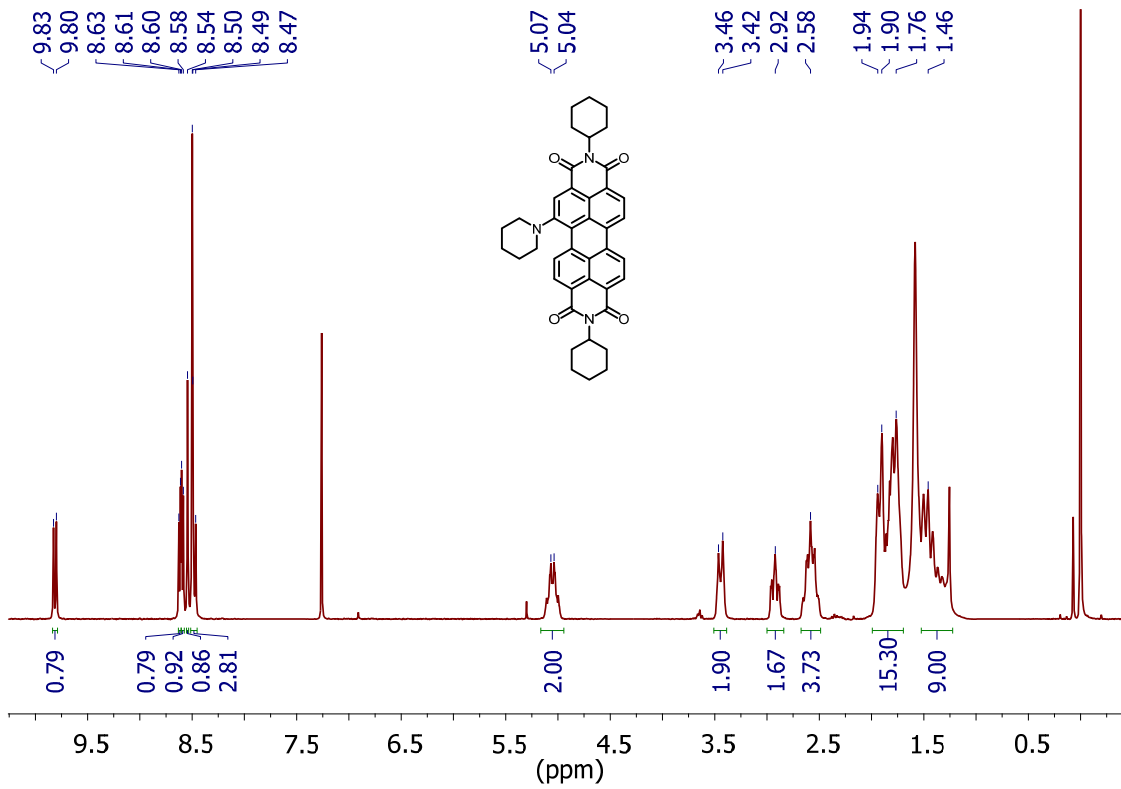

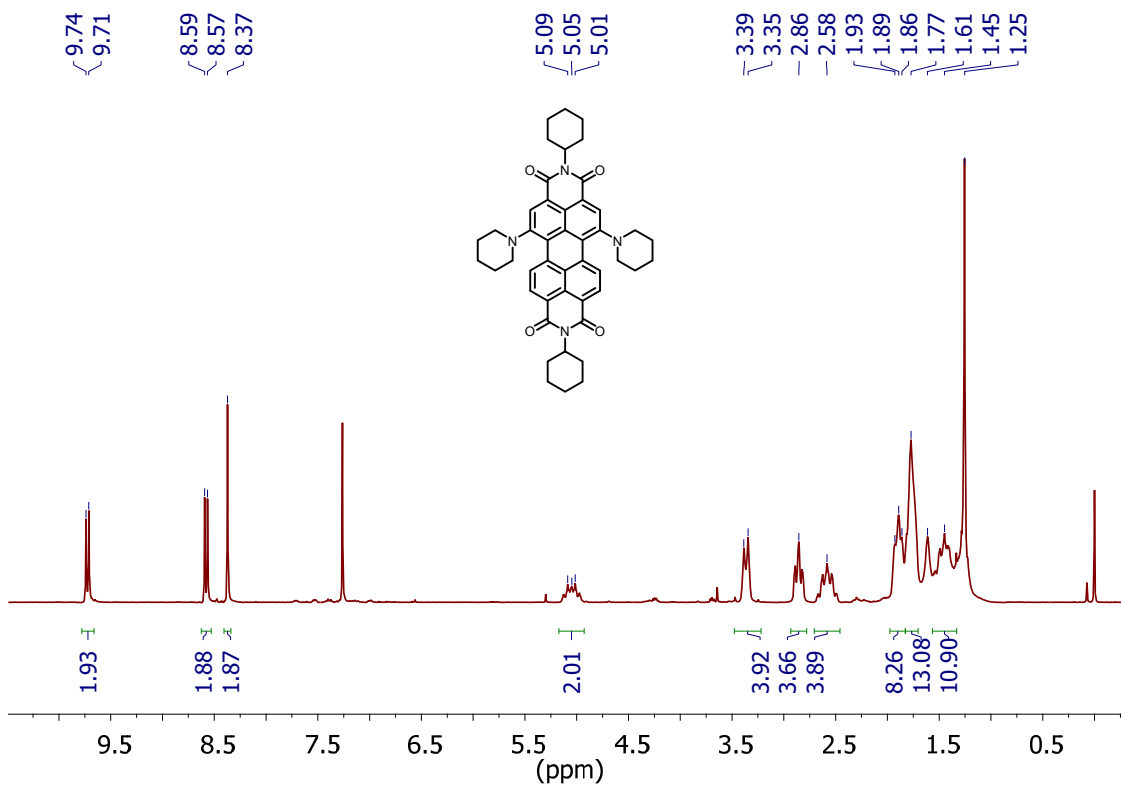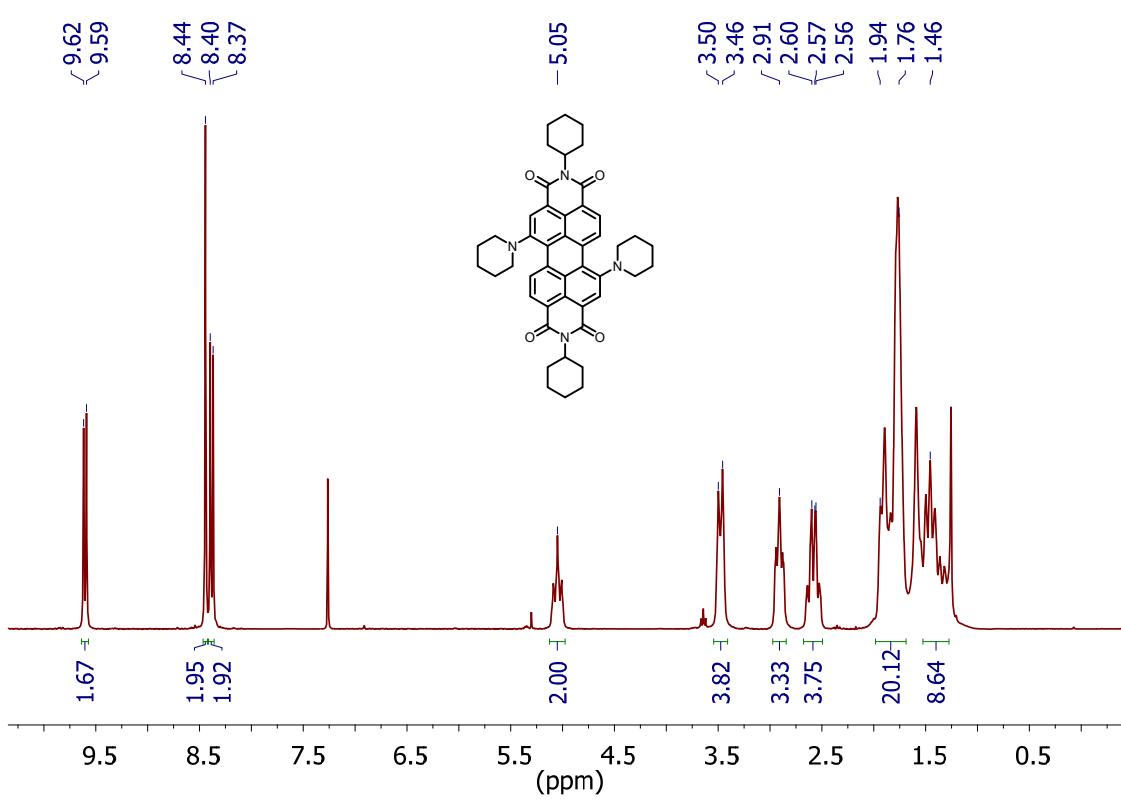

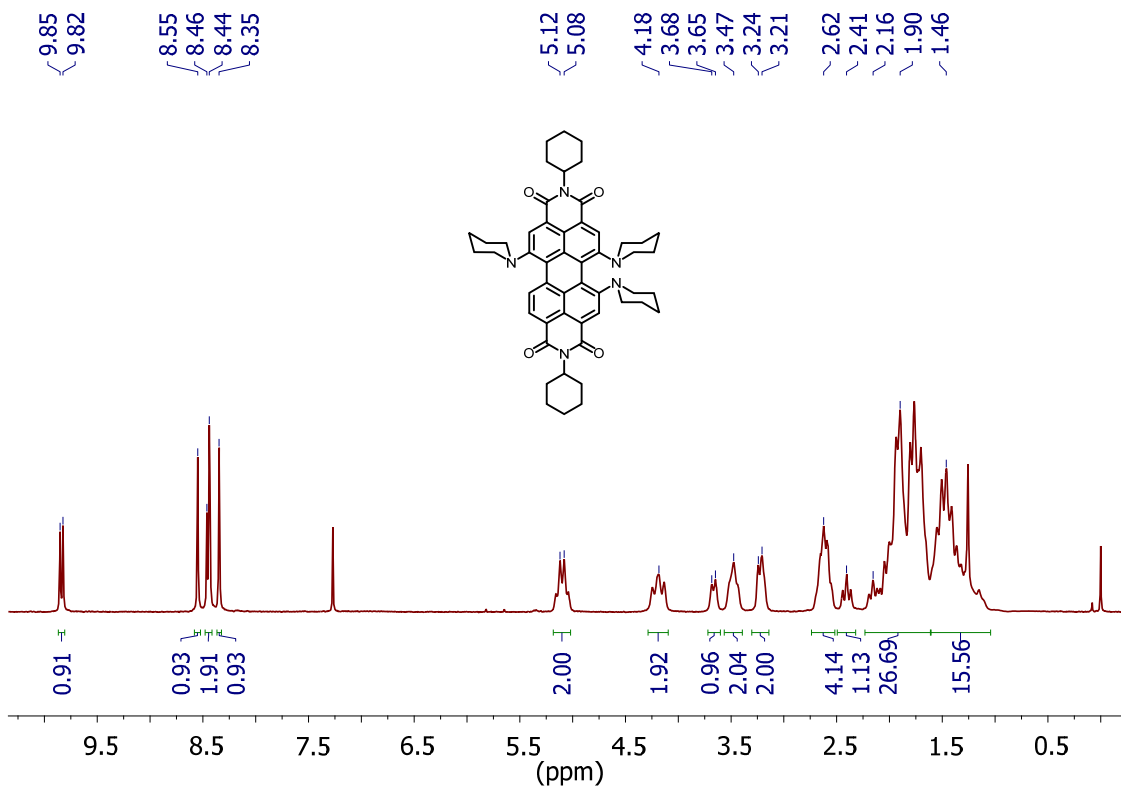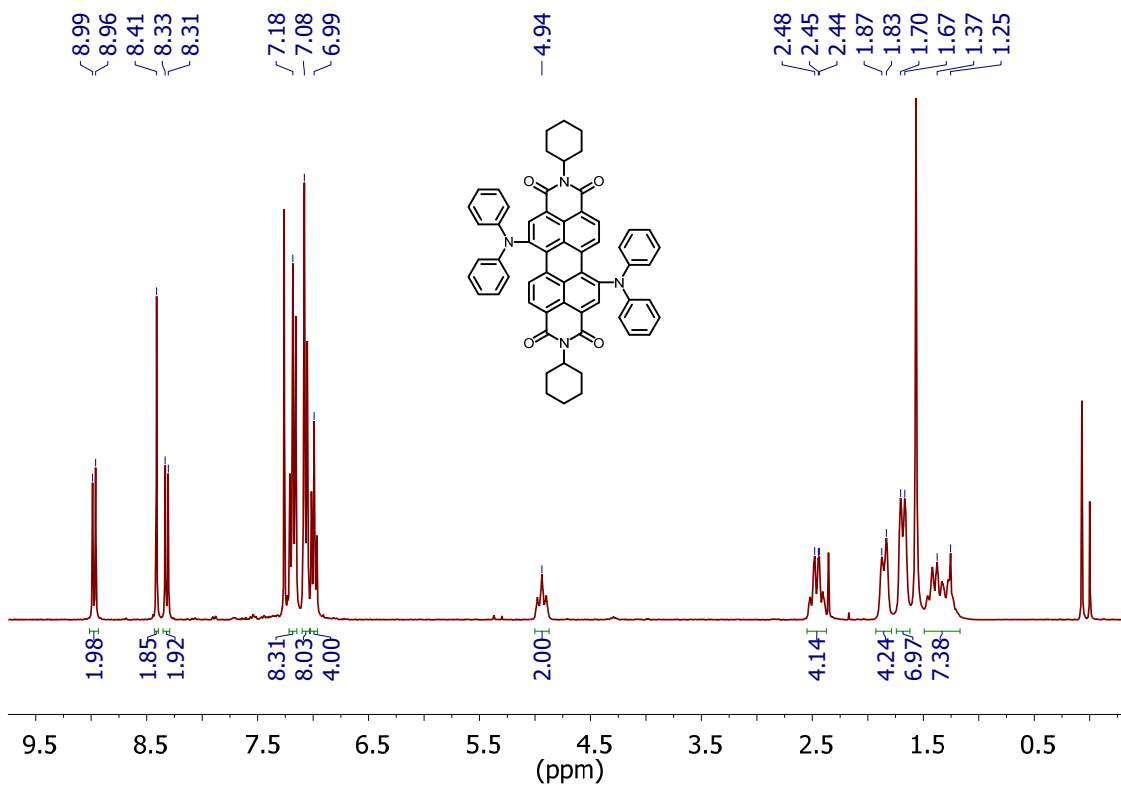

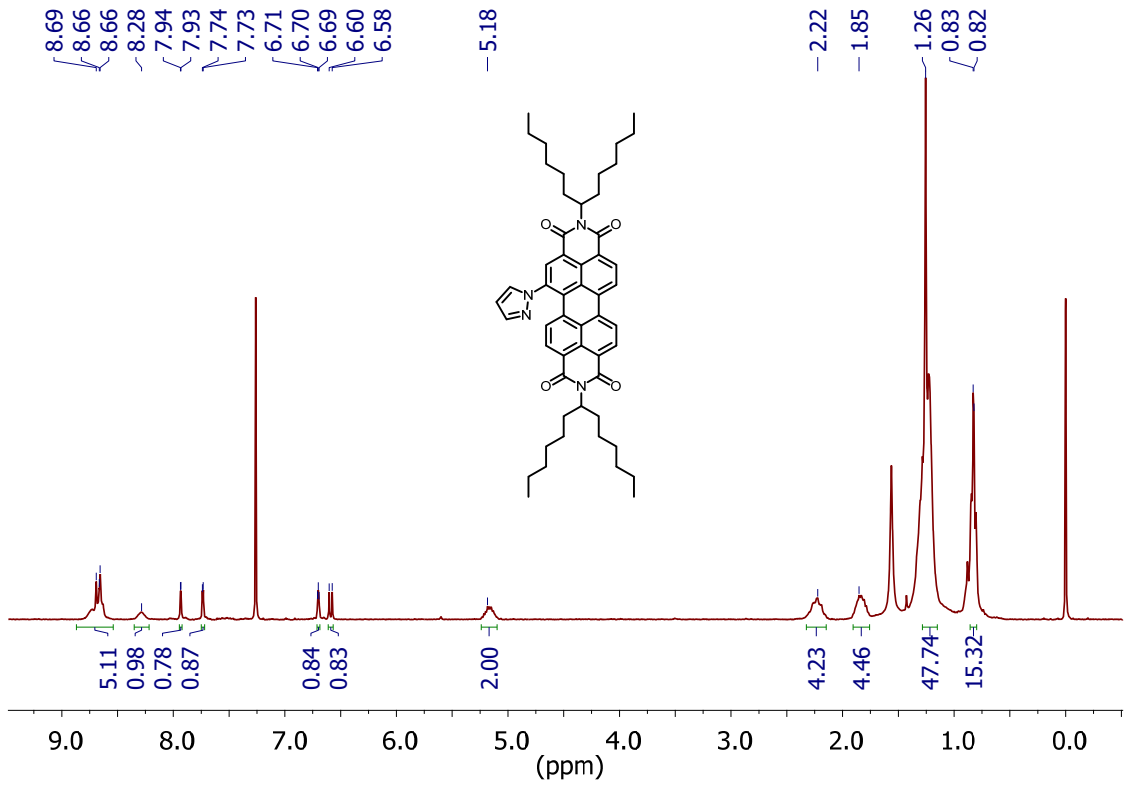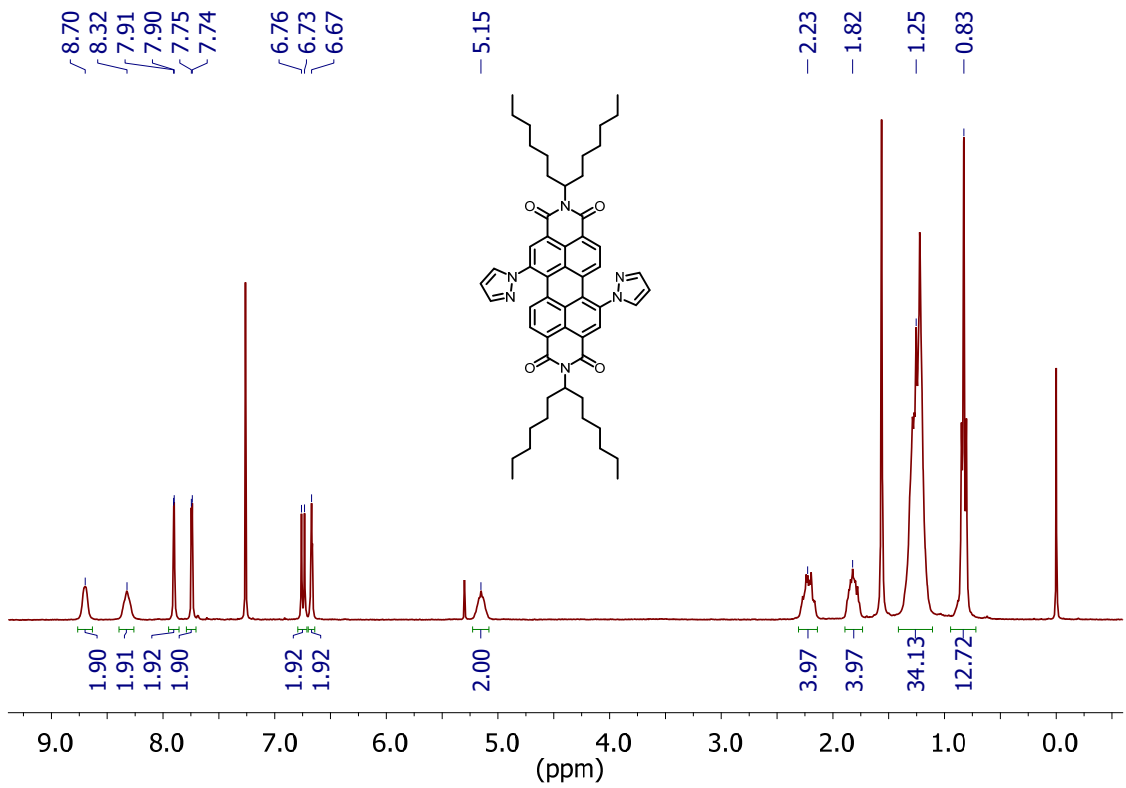

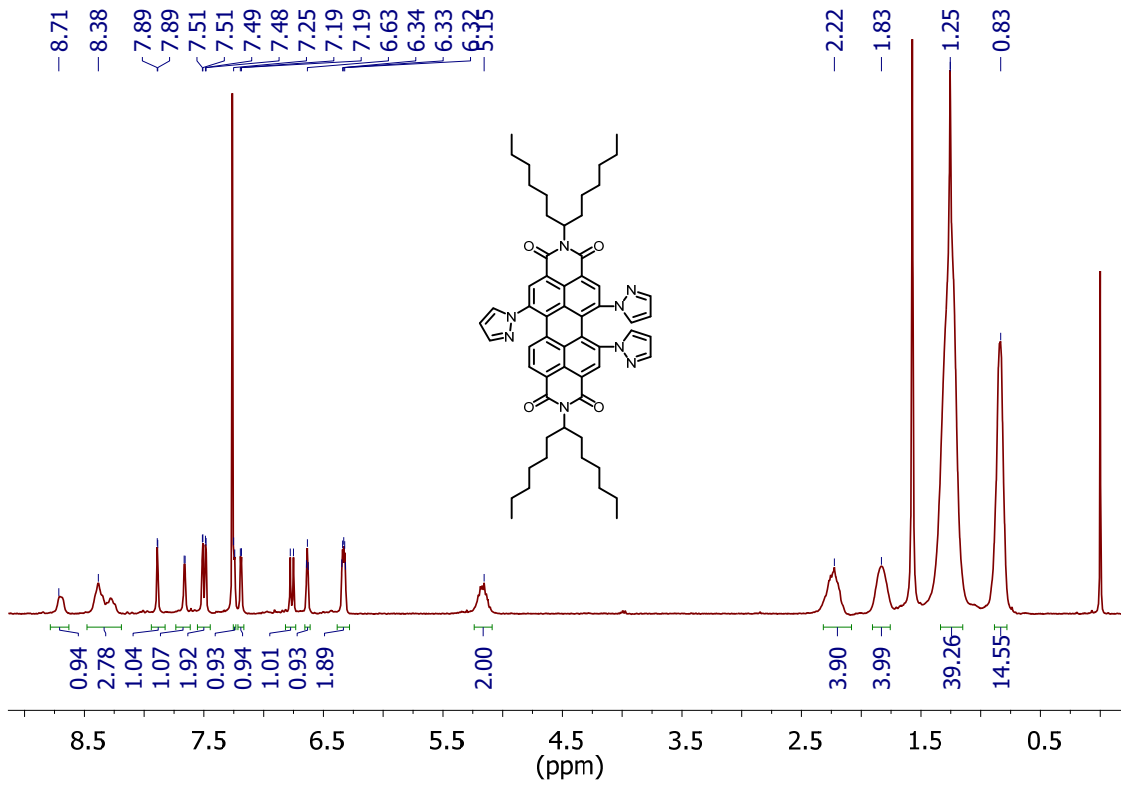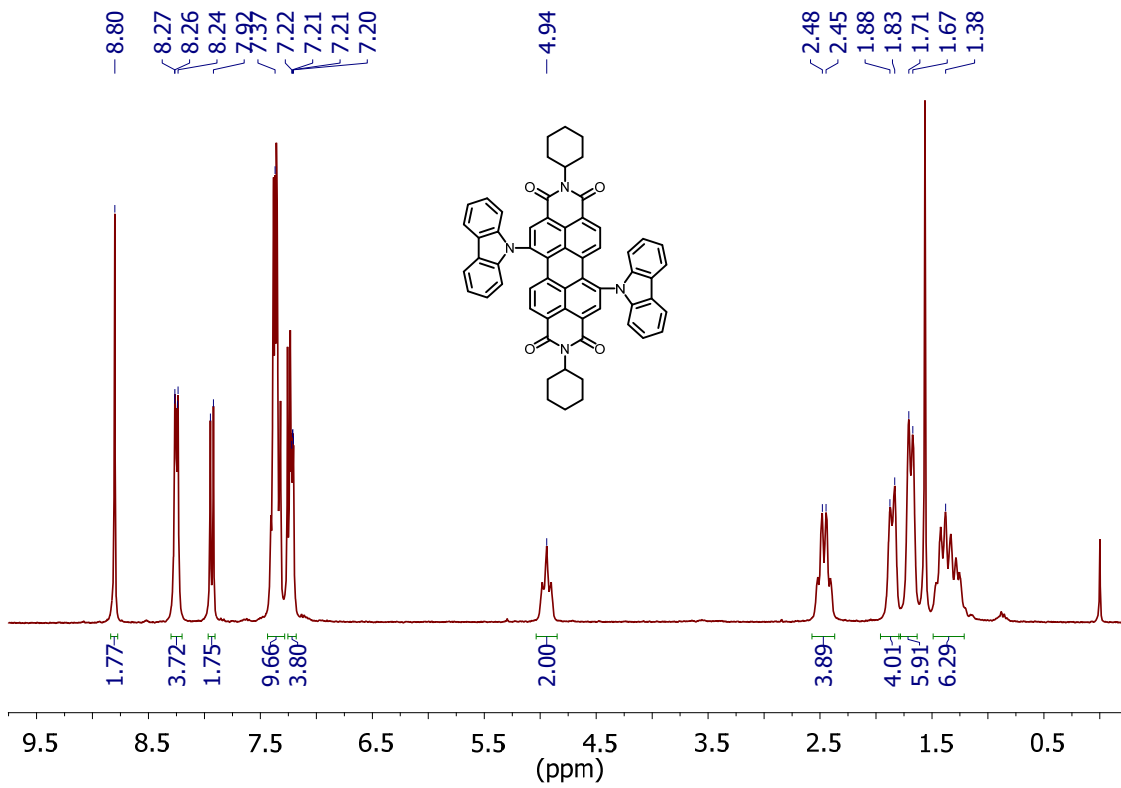

Supplement: c9qo00491b1.pdf [file c9qo00491b1.pdf]
